# Supplementary material for: The Reactions of 6-(Hydroxymethyl)-2,2-dimethyl-1-azaspiro[4.4]nonanes with Methanesulfonyl Chloride or PPh3-CBr4
Source: MDPI journal article supplement (doi:10.3390/molecules26196000), 2021-10-02
Supplement: s1 [file s1]

# The reactions of 6-(hydroxymethyl)-2,2-dimethyl-1-azaspiro[4.4]nonanes with methanesulfonyl chloride and PPh<sub>3</sub>-CBr<sub>4</sub>

Yulia V. Khoroshunova<sup>\*1,2</sup>, Denis A. Morozov<sup>1</sup>, Andrey I. Taratayko<sup>1,2</sup>, Sergey A. Dobrynin<sup>1</sup>, Ilya V. Yeltsov<sup>2</sup>, Tatyana V. Rybalova<sup>1</sup>, Yulia S. Sotnikova<sup>1</sup>, Dmitriy N. Polovyanenko<sup>1</sup>, Nargiz B. Asanbaeva<sup>1,2</sup> and Igor A. Kirilyuk<sup>1</sup>

<sup>1</sup> N.N. Vorozhtsov Institute of Organic Chemistry SB RAS, Academician Lavrentiev Ave. 9, Novosibirsk 630090, Russian Federation; horoshunova@nioch.nsc.ru

<sup>2</sup> Novosibirsk State University, Pirogova Str. 1, Novosibirsk 630090, Russian Federation

\* Correspondence: horoshunova@nioch.nsc.ru

## Supporting Information

### Table of Contents

|                                                                                                                                                                                                 |           |
|-------------------------------------------------------------------------------------------------------------------------------------------------------------------------------------------------|-----------|
| <b>1. IR spectral data .....</b>                                                                                                                                                                | <b>S4</b> |
| 1.1 (5a <i>S</i> ( <i>R</i> ),8a <i>R</i> ( <i>S</i> ))-3,3-Dimethyloctahydrocyclopenta[2,3]azeto[1,2- <i>a</i> ]pyrrole ( <b>3</b> ) ( <b>Figure S1</b> )                                      | S4        |
| 1.2 (5a <i>S</i> ( <i>R</i> ),8a <i>R</i> ( <i>S</i> ))-3,3-Dimethyloctahydro-1 <i>H</i> -cyclopenta[2,3]azeto[1,2- <i>a</i> ]pyrrol-4-ium bromide (3×HBr) ( <b>Figure S2</b> ) .....           | S4        |
| 1.3 ((5 <i>R</i> ( <i>S</i> ),6 <i>R</i> ( <i>S</i> ))-1-(Benzyloxy)-2,2-dimethyl-1-azaspiro[4.4]nonan-6-yl)-methanol ( <b>1c</b> ) ( <b>Figure S3</b> ) .....                                  | S5        |
| 1.4 2-(Benzyloxy)-3,3-dimethyl-1,2,3,4,5,7,8,8a-octahydrocyclopenta[ <i>c</i> ]azepine ( <b>4c</b> ) ( <b>Figure S4</b> ) .....                                                                 | S5        |
| 1.5 2-(Benzyloxy)-3,3-dimethyl-1,2,3,4,6,7,8,8a-octahydrocyclopenta[ <i>c</i> ]azepine ( <b>5c</b> ) ( <b>Figure S5</b> ) .....                                                                 | S6        |
| 1.6 (5 <i>R</i> ( <i>S</i> ),6 <i>R</i> ( <i>S</i> ))-6-(Hydroxymethyl)-2,2-dimethyl-1-azaspiro[4.4]nonan-1-yl benzoate ( <b>1d</b> ) ( <b>Figure S6</b> ) .....                                | S6        |
| 1.7 3,3-Dimethyl-1,4,5,7,8,8a-hexahydrocyclopenta[ <i>c</i> ]azepin-2(3 <i>H</i> )-yl benzoate ( <b>4d</b> ) ( <b>Figure S7</b> ) .....                                                         | S7        |
| 1.8 3,3-Dimethyl-3,4,6,7,8,8a-hexahydrocyclopenta[ <i>c</i> ]azepin-2(1 <i>H</i> )-yl benzoate ( <b>5d</b> ) ( <b>Figure S8</b> ) .....                                                         | S7        |
| 1.9 (5 <i>R</i> ( <i>S</i> ),6 <i>R</i> ( <i>S</i> ))-6-((Benzoyloxy)methyl)-2,2-dimethyl-1-azaspiro[4.4]nonan-1-oxyl ( <b>13</b> ) ( <b>Figure S9</b> ) .....                                  | S8        |
| 1.10 (5a <i>S</i> ( <i>R</i> ),8a <i>R</i> ( <i>S</i> ))-3,3,4-Trimethyloctahydro-1 <i>H</i> -cyclopenta[2,3]azeto[1,2- <i>a</i> ]pyrrol-4-ium iodide ( <b>15</b> ) ( <b>Figure S10</b> ) ..... | S8        |
| 1.11 2,3,3-Trimethyl-1,2,3,4,5,7,8,8a-octahydrocyclopenta[ <i>c</i> ]azepine ( <b>16</b> ) ( <b>Figure S11</b> ) .....                                                                          | S9        |
| <b>2. UV spectral data.....</b>                                                                                                                                                                 | <b>S9</b> |
| 2.1 (5 <i>R</i> ( <i>S</i> ),6 <i>R</i> ( <i>S</i> ))-6-((Benzoyloxy)methyl)-2,2-dimethyl-1-azaspiro[4.4]nonan-1-oxyl ( <b>13</b> ) ( <b>Figure S12</b> ) .....                                 | S9        |

|                                                                                                                                                                                                      |            |
|------------------------------------------------------------------------------------------------------------------------------------------------------------------------------------------------------|------------|
| <b>3. <sup>1</sup>H and <sup>13</sup>C NMR spectral data .....</b>                                                                                                                                   | <b>S10</b> |
| 3.1 (5a <i>S</i> ( <i>R</i> ),8a <i>R</i> ( <i>S</i> ))-3,3-Dimethyloctahydrocyclopenta[2,3]azeto[1,2- <i>a</i> ]pyrrole ( <b>3</b> ) ( <b>Figure S13, S14</b> ) .....                               | S10        |
| 3.2 (5a <i>S</i> ( <i>R</i> ),8a <i>R</i> ( <i>S</i> ))-3,3-Dimethyloctahydro-1 <i>H</i> -cyclopenta[2,3]azeto[1,2- <i>a</i> ]pyrrol-4-ium bromide (3×HBr) ( <b>Figure S15, S16</b> ).....           | S11        |
| 3.3 ((5 <i>R</i> ( <i>S</i> ),6 <i>R</i> ( <i>S</i> ))-1-(Benzyloxy)-2,2-dimethyl-1-azaspiro[4.4]nonan-6-yl)-methanol ( <b>1c</b> ) ( <b>Figure S17, S18</b> ).....                                  | S12        |
| 3.4 2-(Benzyloxy)-3,3-dimethyl-1,2,3,4,5,7,8,8a-octahydrocyclopenta[ <i>c</i> ]azepine ( <b>4c</b> ) ( <b>Figure S19, S20, S21, S22</b> ).....                                                       | S13        |
| 3.5 2-(Benzyloxy)-3,3-dimethyl-1,2,3,4,6,7,8,8a-octahydrocyclopenta[ <i>c</i> ]azepine ( <b>5c</b> ) ( <b>Figure S23, S24</b> ) .....                                                                | S15        |
| 3.6 (5 <i>R</i> ( <i>S</i> ),6 <i>R</i> ( <i>S</i> ))-6-(Hydroxymethyl)-2,2-dimethyl-1-azaspiro[4.4]nonan-1-yl benzoate ( <b>1d</b> ) ( <b>Figure S25, S26</b> ).....                                | S16        |
| 3.7 3,3-Dimethyl-1,4,5,7,8,8a-hexahydrocyclopenta[ <i>c</i> ]azepin-2(3 <i>H</i> )-yl benzoate ( <b>4d</b> ) ( <b>Figure S27, S28</b> ).....                                                         | S17        |
| 3.8 3,3-Dimethyl-3,4,6,7,8,8a-hexahydrocyclopenta[ <i>c</i> ]azepin-2(1 <i>H</i> )-yl benzoate ( <b>5d</b> ) ( <b>Figure S29, S30</b> ) .....                                                        | S18        |
| 3.9 (5 <i>R</i> ( <i>S</i> ),6 <i>R</i> ( <i>S</i> ))-6-((Benzoyloxy)methyl)-2,2-dimethyl-1-azaspiro[4.4]nonan-1-ium 2,2,2-trifluoroacetate ( <b>14</b> ) ( <b>Figure S31</b> ).....                 | S19        |
| 3.10 (5a <i>S</i> ( <i>R</i> ),8a <i>R</i> ( <i>S</i> ))-3,3,4-Trimethyloctahydro-1 <i>H</i> -cyclopenta[2,3]azeto[1,2- <i>a</i> ]pyrrol-4-ium iodide ( <b>15</b> ) ( <b>Figure S32, S33</b> ) ..... | S19        |
| 3.11 2,3,3-Trimethyl-1,2,3,4,5,7,8,8a-octahydrocyclopenta[ <i>c</i> ]azepine ( <b>16</b> ) ( <b>Figure S34, S35</b> )....                                                                            | S20        |
| <b>4. 2D NMR spectral data .....</b>                                                                                                                                                                 | <b>S21</b> |
| 4.1 (5a <i>S</i> ( <i>R</i> ),8a <i>R</i> ( <i>S</i> ))-3,3-Dimethyloctahydrocyclopenta[2,3]azeto[1,2- <i>a</i> ]pyrrole ( <b>3</b> ) ( <b>Figure S36, S37, S38</b> ) .....                          | S21        |
| 4.2 (5a <i>S</i> ( <i>R</i> ),8a <i>R</i> ( <i>S</i> ))-3,3-Dimethyloctahydro-1 <i>H</i> -cyclopenta[2,3]azeto[1,2- <i>a</i> ]pyrrol-4-ium bromide (3×HBr) ( <b>Figure S39, S40, S41</b> ) .....     | S23        |
| 4.3 (2-(Benzyloxy)-3,3-dimethyl-1,2,3,4,5,7,8,8a-octahydrocyclopenta[ <i>c</i> ]azepine ( <b>4c</b> ) ( <b>Figure S42, S43, S44</b> ).....                                                           | S24        |
| 4.4 (2-(Benzyloxy)-3,3-dimethyl-1,2,3,4,6,7,8,8a-octahydrocyclopenta[ <i>c</i> ]azepine ( <b>5c</b> ) ( <b>Figure S45, S46, S47</b> ).....                                                           | S26        |
| 4.5 (3,3-Dimethyl-1,4,5,7,8,8a-hexahydrocyclopenta[ <i>c</i> ]azepin-2(3 <i>H</i> )-yl benzoate ( <b>4d</b> ) ( <b>Figure S48, S49, S50</b> ).....                                                   | S27        |
| 4.6 (3,3-Dimethyl-3,4,6,7,8,8a-hexahydrocyclopenta[ <i>c</i> ]azepin-2(1 <i>H</i> )-yl benzoate ( <b>5d</b> ) ( <b>Figure S51, S52, S53</b> ).....                                                   | S29        |
| 4.7 (2,3,3-Trimethyl-1,2,3,4,5,7,8,8a-octahydrocyclopenta[ <i>c</i> ]azepine ( <b>16</b> ) ( <b>Figure S54, S55, S56</b> ) .....                                                                     | S30        |
| <b>5. EPR spectral data .....</b>                                                                                                                                                                    | <b>S32</b> |
| 5.1 (5 <i>R</i> ( <i>S</i> ),6 <i>R</i> ( <i>S</i> ))-6-((Benzoyloxy)methyl)-2,2-dimethyl-1-azaspiro[4.4]nonan-1-oxyl ( <b>13</b> ) ( <b>Figure S57</b> ) .....                                      | S32        |

|                                                                                                                                                                                                                                                                                           |     |
|-------------------------------------------------------------------------------------------------------------------------------------------------------------------------------------------------------------------------------------------------------------------------------------------|-----|
| <b>6. Gas chromatography data</b> .....                                                                                                                                                                                                                                                   | S32 |
| 6.1 Gas chromatography data of Hofmann elimination of salt <b>15</b> (reaction mass) ( <b>Figure S58, Table S1</b> ) .....                                                                                                                                                                | S32 |
| <b>7. X-ray analysis data for compound 3×HBr</b> .....                                                                                                                                                                                                                                    | S33 |
| 7.1 Experimental details for compound <b>3×HBr</b> .....                                                                                                                                                                                                                                  | S33 |
| 7.2 The structure and atom numbering of <b>3×HBr</b> ( <b>Figure S59</b> ) .....                                                                                                                                                                                                          | S33 |
| <b>8. NMR spectrum fine structure analysis</b> .....                                                                                                                                                                                                                                      | S34 |
| 8.1 (5a <i>S</i> ( <i>R</i> ),8a <i>R</i> ( <i>S</i> ))-3,3-Dimethyloctahydro-1 <i>H</i> -cyclopenta[2,3]azeto[1,2- <i>a</i> ]pyrrol-4-ium bromide ( <b>3×HBr</b> ) ( <b>Figure S60</b> ) .....                                                                                           | S34 |
| 8.2 Line shape analysis of multiplets for <b>3×HBr</b> ( <b>Figure S61, Table S2</b> ) .....                                                                                                                                                                                              | S35 |
| <b>9. HPLC analysis</b> .....                                                                                                                                                                                                                                                             | S37 |
| 9.1 HPLC analysis of 2-(benzyloxy)-3,3-dimethyl-1,2,3,4,5,7,8,8a-octahydrocyclopenta[ <i>c</i> ]azepine ( <b>4c</b> ) and 2-(benzyloxy)-3,3-dimethyl-1,2,3,4,5,6,7,8-octahydrocyclopenta[ <i>c</i> ]azepine ( <b>6c</b> ) mixture and pure <b>4c</b> fraction ( <b>Figure S62</b> ) ..... | S37 |

# 1. IR spectral data

## 1.1 (5a*S*(*R*),8a*R*(*S*))-3,3-Dimethyloctahydrocyclopenta[2,3]azeto[1,2-*a*]pyrrole (**3**)

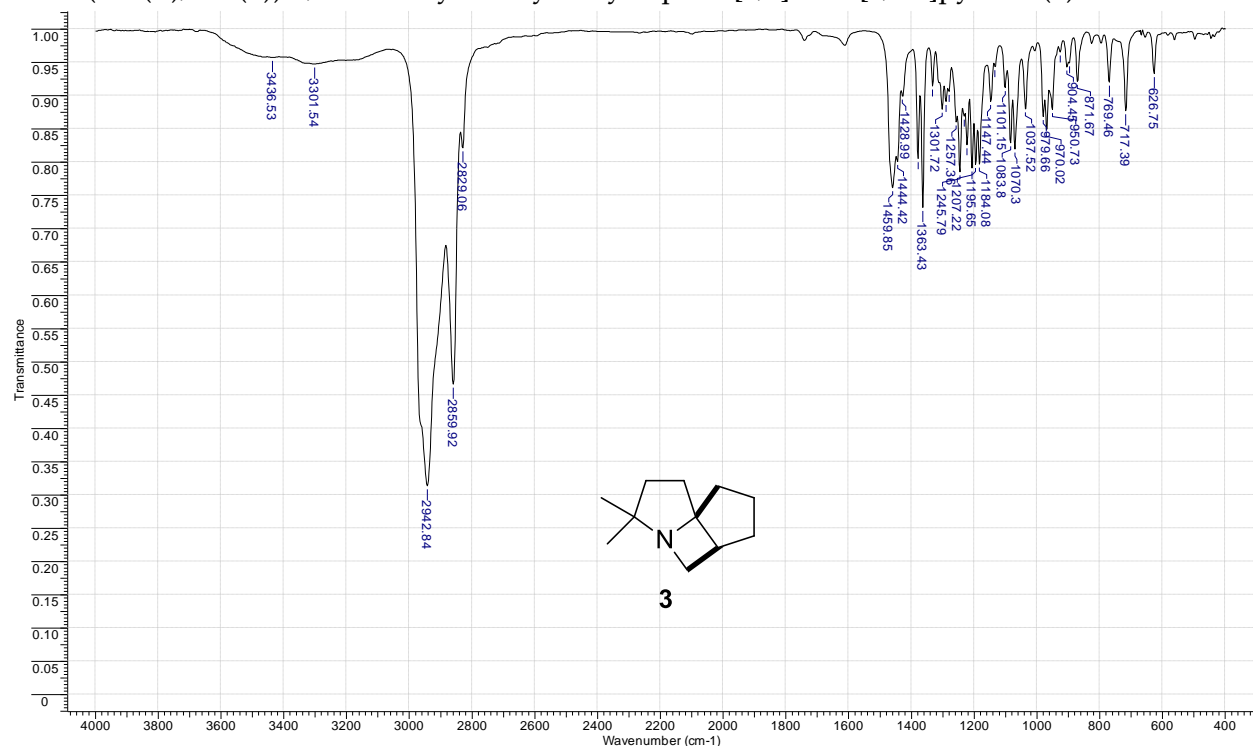

Figure S1. IR spectrum of **3** (neat)

## 1.2 (5a*S*(*R*),8a*R*(*S*))-3,3-Dimethyloctahydro-1*H*-cyclopenta[2,3]azeto[1,2-*a*]pyrrol-4-ium bromide (**3**×HBr)

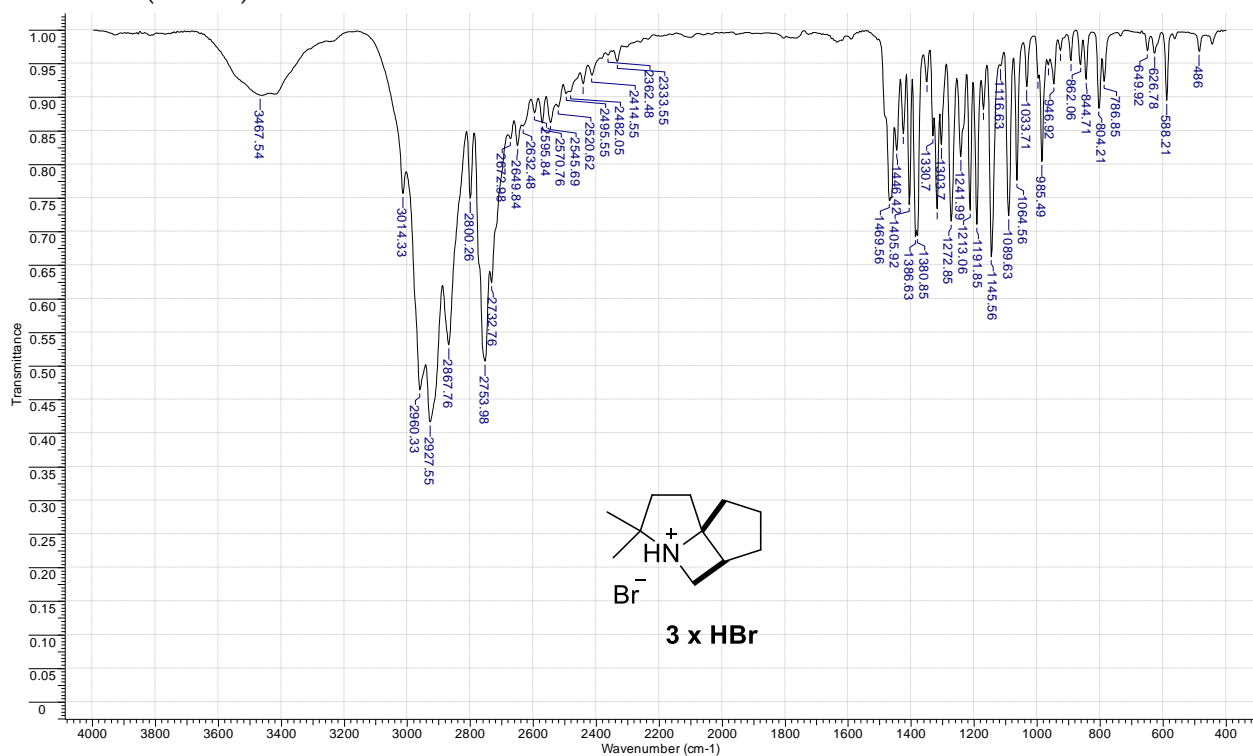

Figure S2. IR spectrum of **3**×HBr (KBr)

1.3 ((5*R*(*S*),6*R*(*S*)-1-(Benzyloxy)-2,2-dimethyl-1-azaspiro[4.4]nonan-6-yl)-methanol (**1c**)

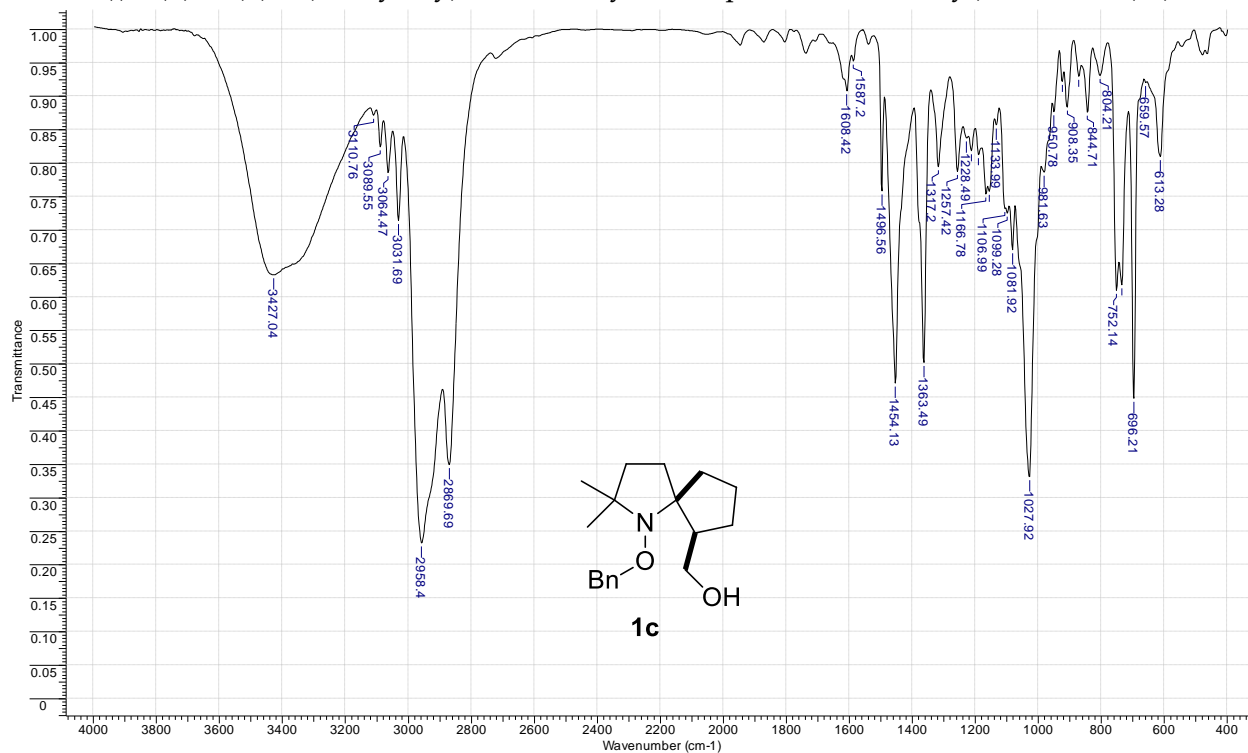

Figure S3. IR spectrum of **1c** (neat)

1.4 2-(Benzyloxy)-3,3-dimethyl-1,2,3,4,5,7,8,8a-octahydrocyclopenta[*c*]azepine (**4c**)

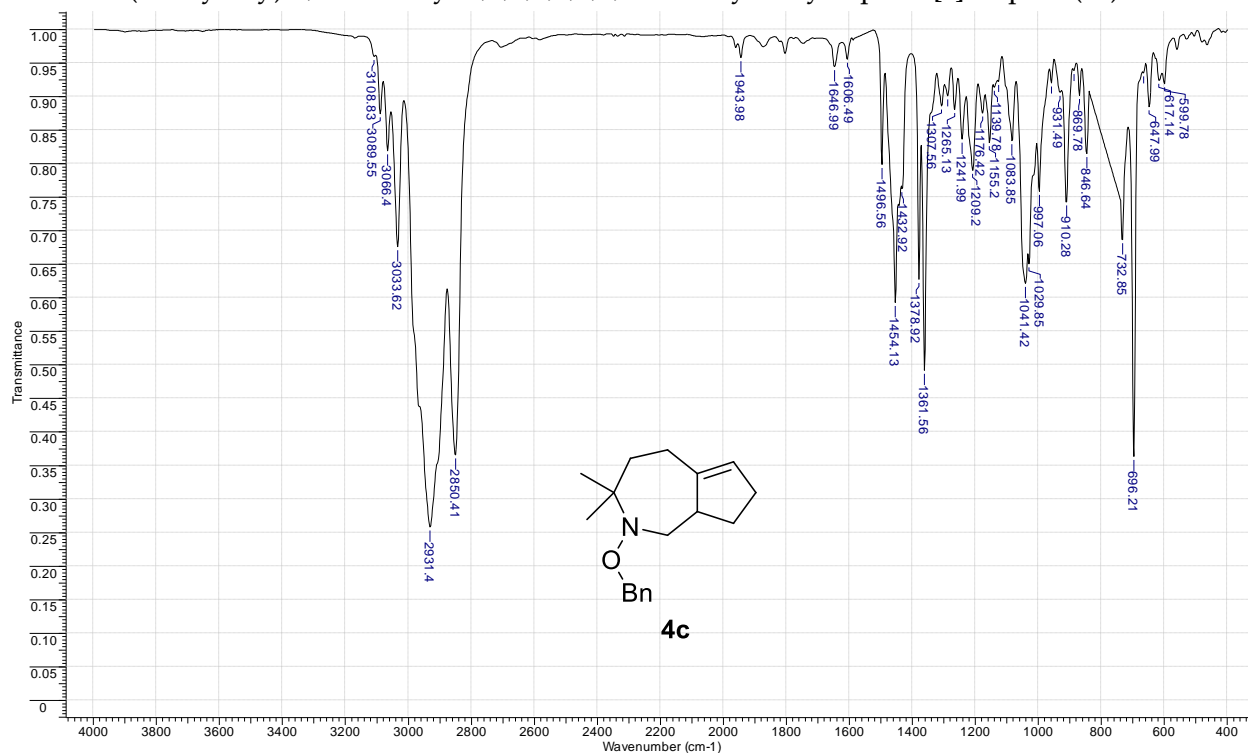

Figure S4. IR spectrum of **4c** (2% solution in CCl<sub>4</sub>)

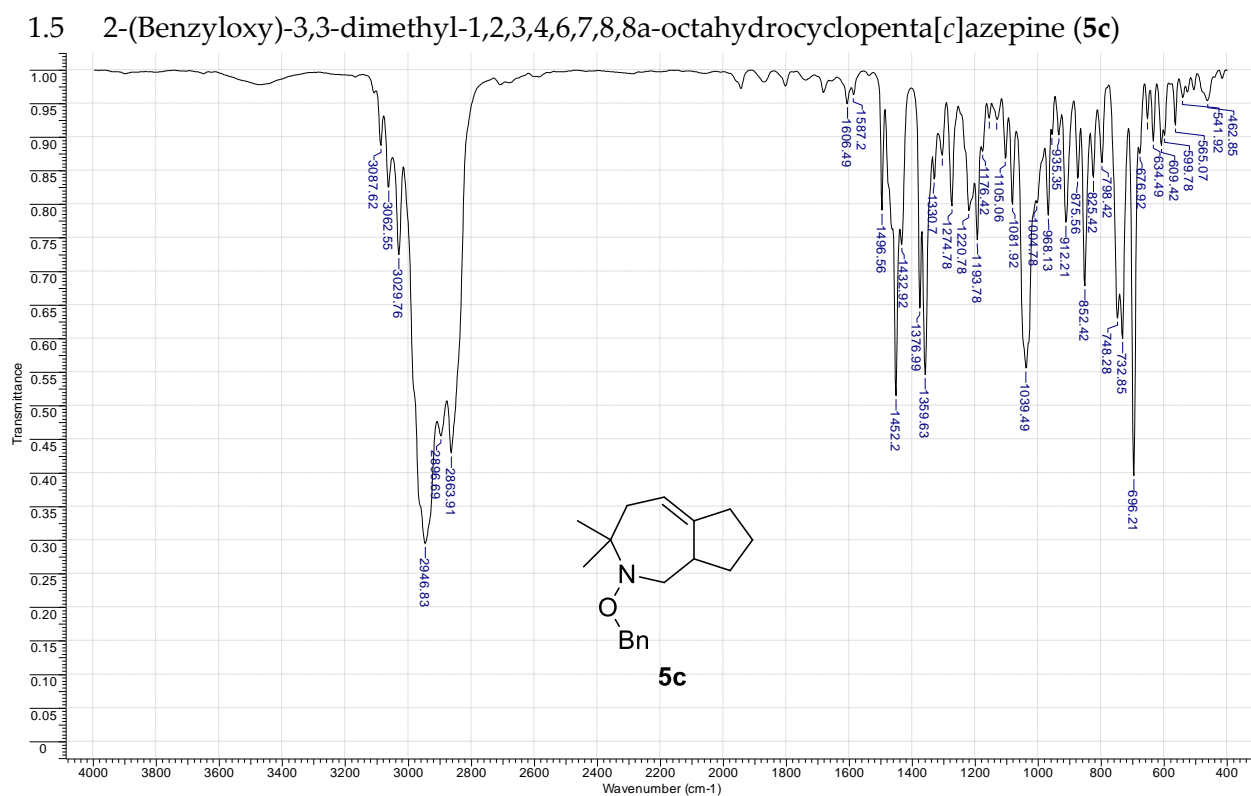

Figure S5. IR spectrum of **5c** (neat)

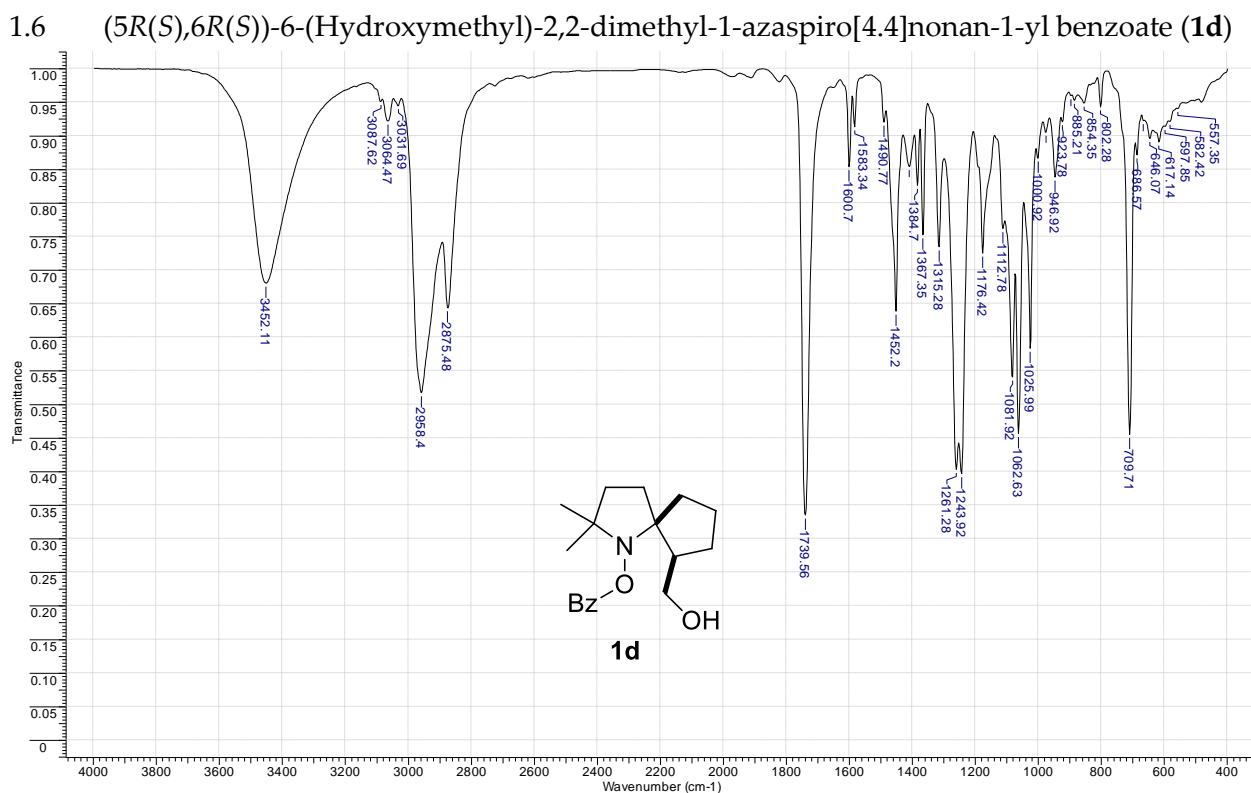

Figure S6. IR spectrum of **1d** (neat)

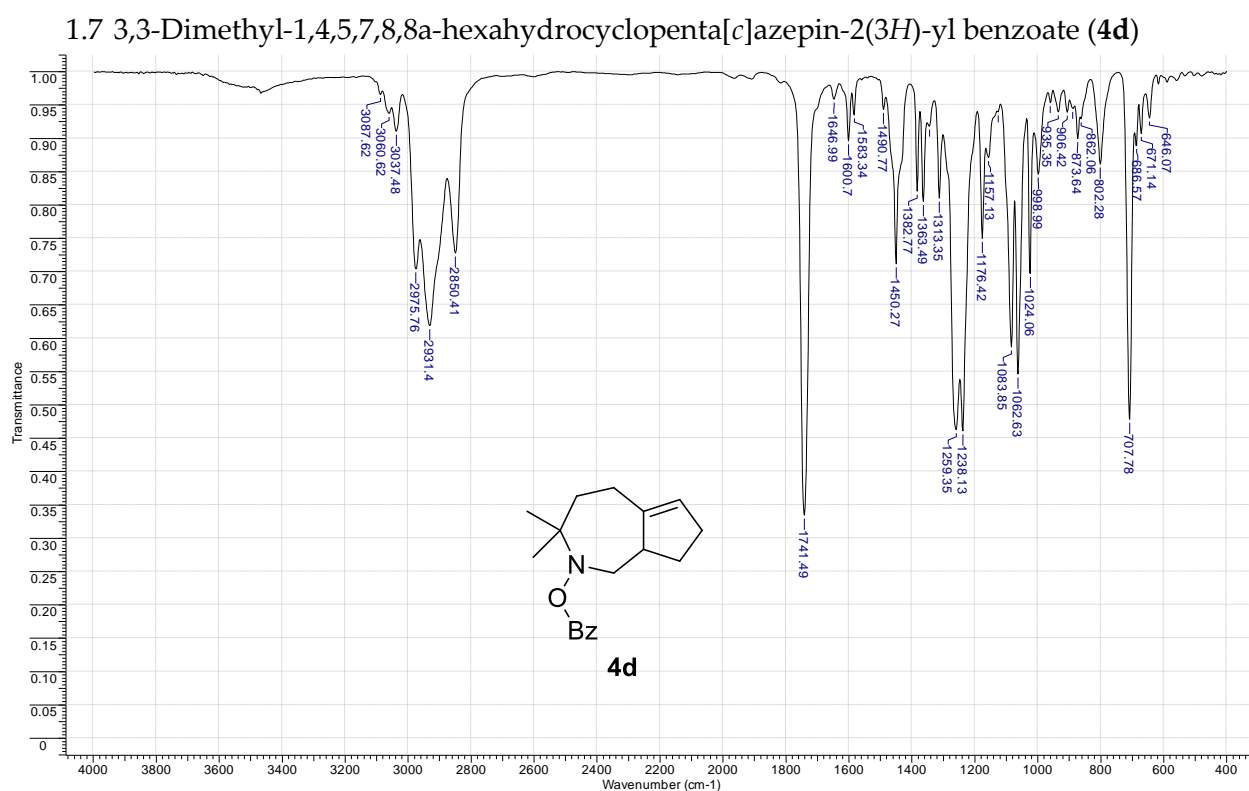

Figure S7. IR spectrum of **4d** (neat)

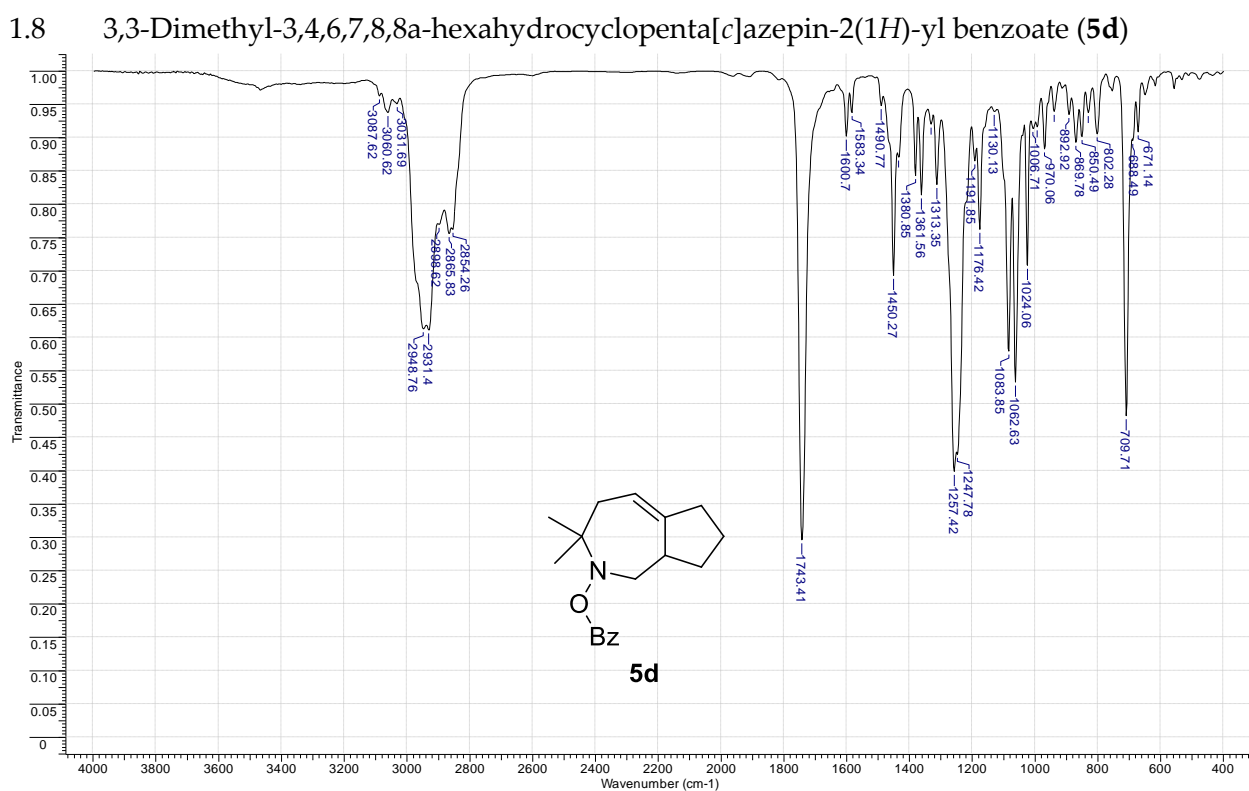

Figure S8. IR spectrum of **5d** (neat)

1.9 (5*R*(*S*),6*R*(*S*))-6-((Benzoyloxy)methyl)-2,2-dimethyl-1-azaspiro[4.4]nonan-1-oxyl (**13**)

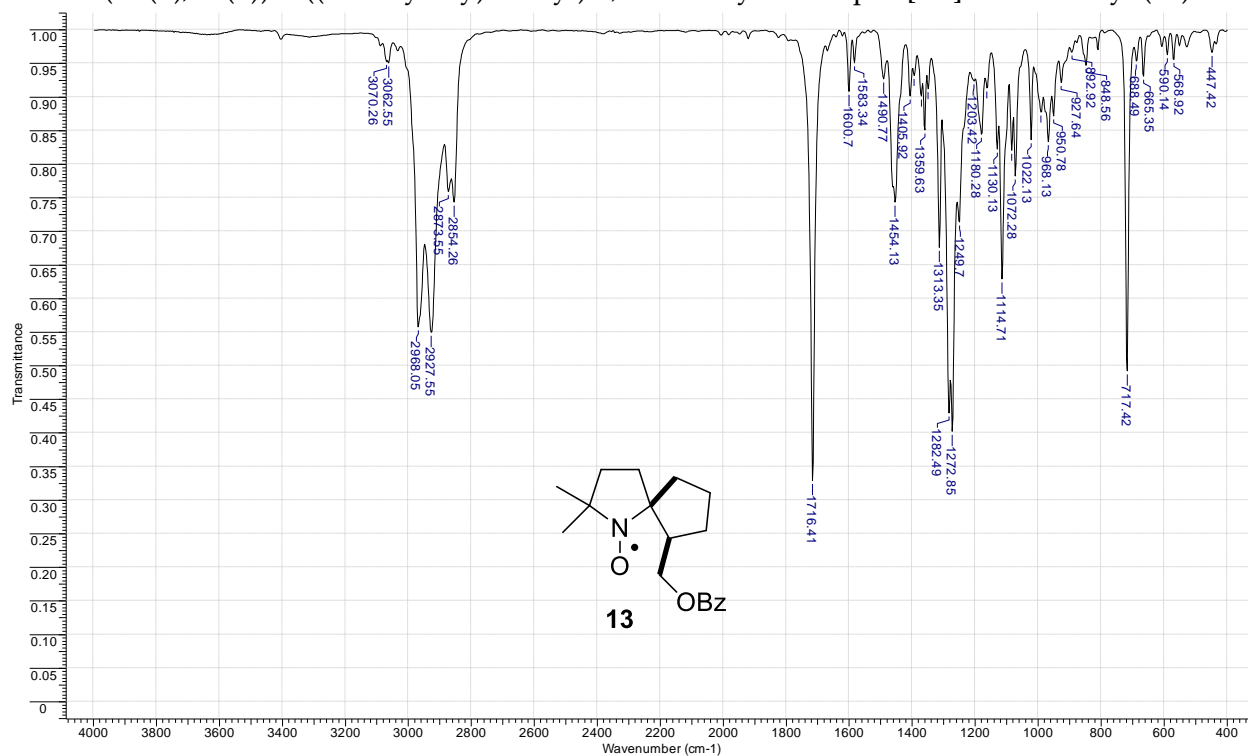

Figure S9. IR spectrum of **13** (KBr)

1.10 (5*aS*(*R*),8*aR*(*S*))-3,3,4-Trimethyloctahydro-1*H*-cyclopenta[2,3]azeto[1,2-*a*]pyrrol-4-ium iodide (**15**)

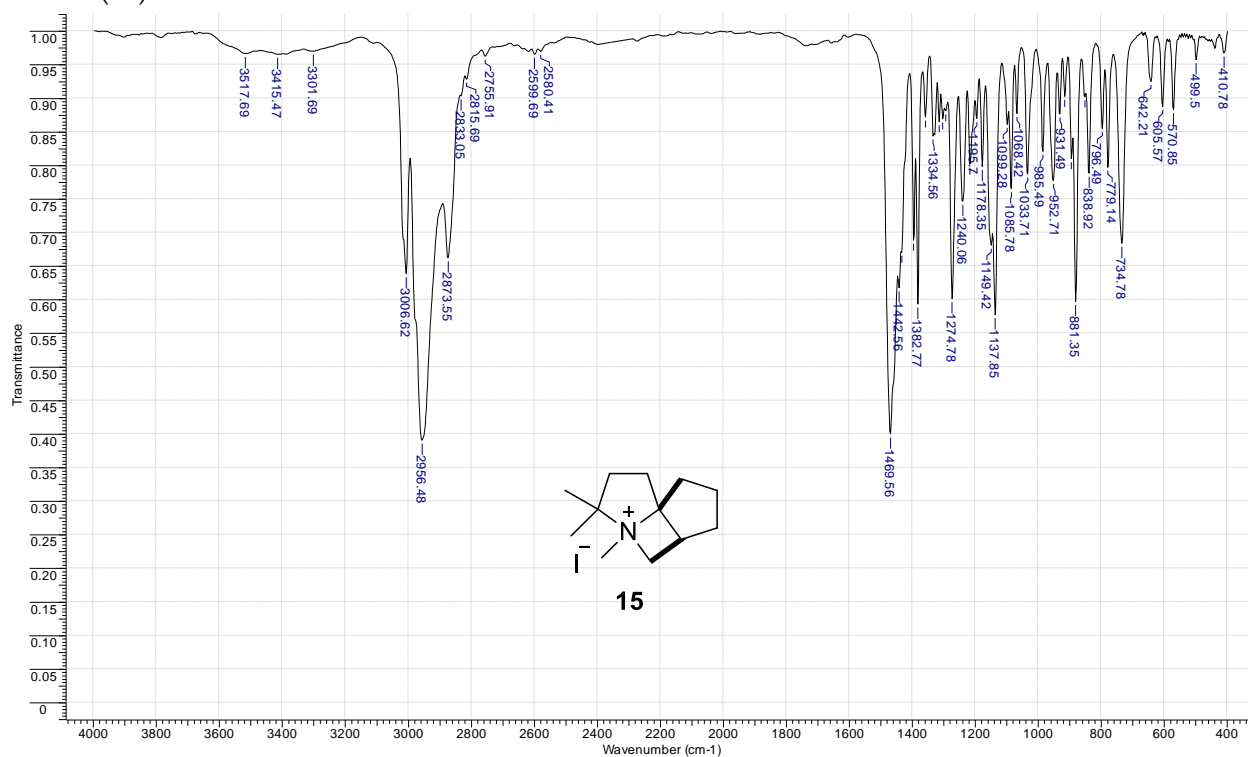

Figure S10. IR spectrum of **15** (KBr)



1.11 2,3,3-Trimethyl-1,2,3,4,5,7,8,8a-octahydrocyclopenta[c]azepine (**16**)

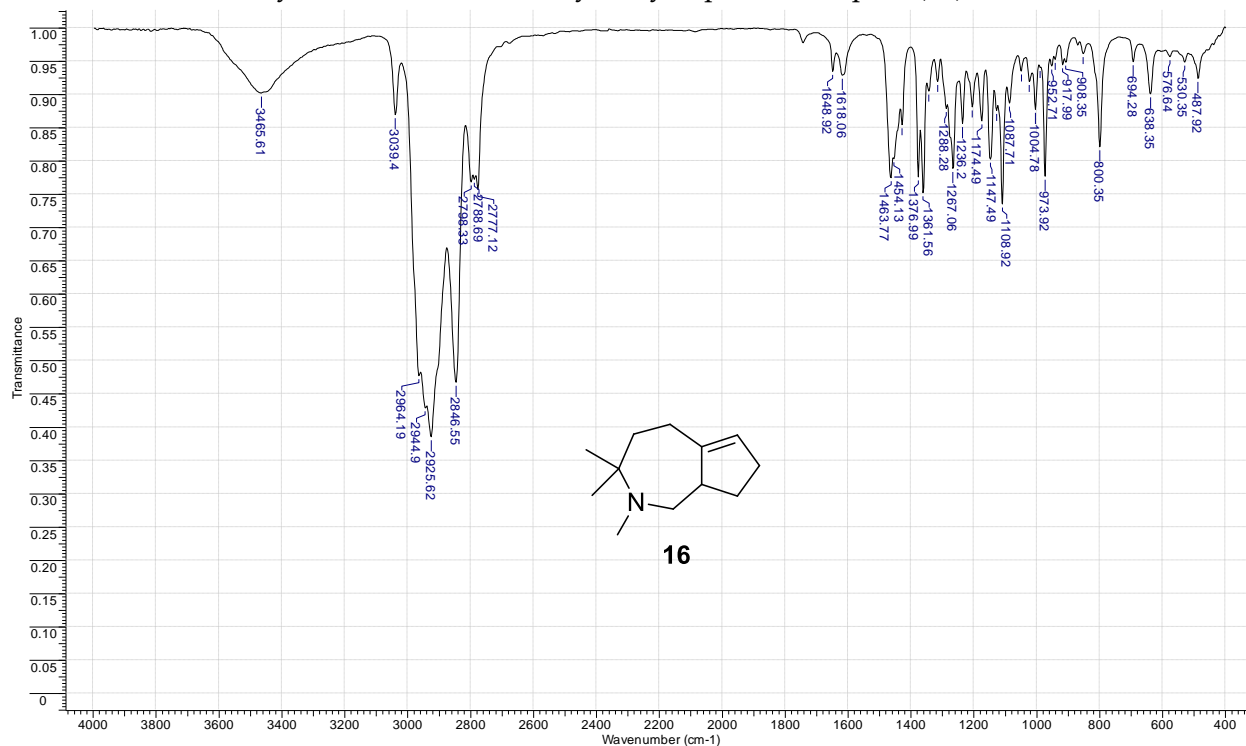

Figure S11. IR spectrum of **16** (neat)

2. UV spectral data

2.1 (5*R*(*S*),6*R*(*S*))-6-((Benzoyloxy)methyl)-2,2-dimethyl-1-azaspiro[4.4]nonan-1-oxyl (**13**)

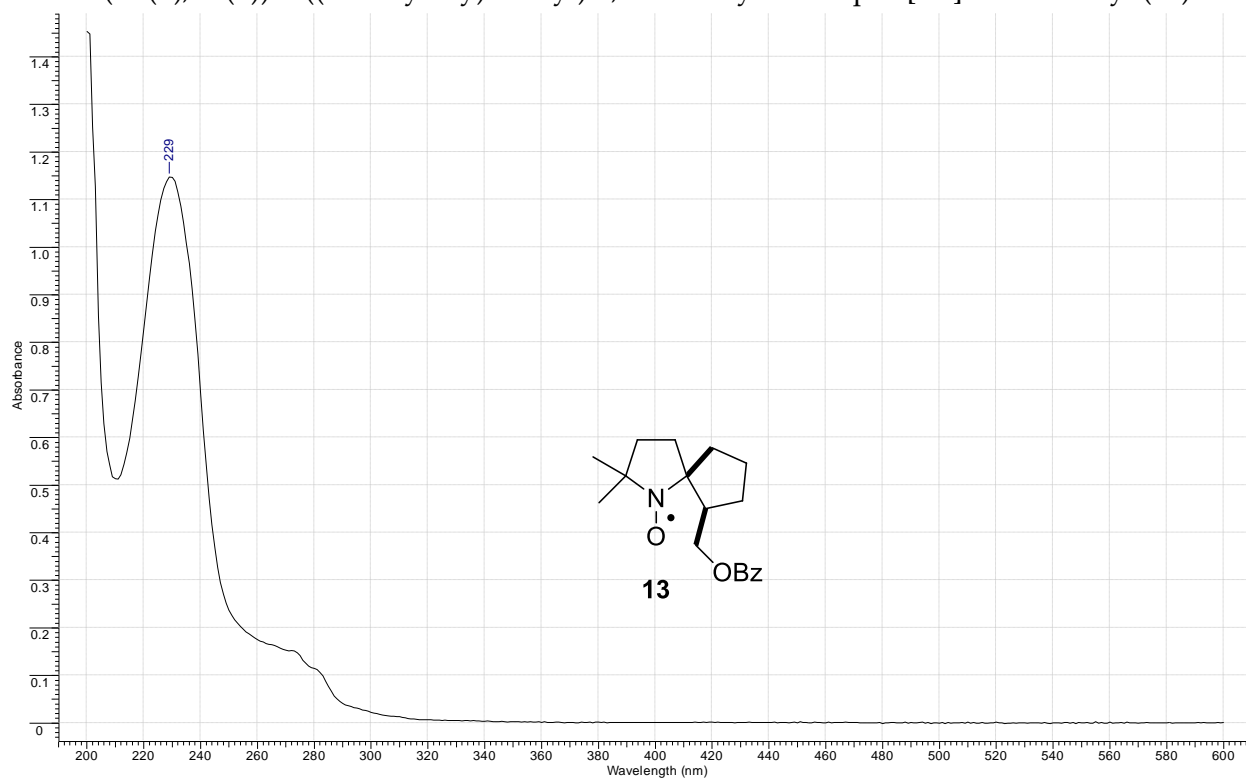

Figure S12. UV spectrum of **13** in EtOH (0.757mg/25ml, L=1cm)

3.  $^1\text{H}$  and  $^{13}\text{C}$  NMR spectral data

3.1 (5a*S*(*R*),8a*R*(*S*))-3,3-Dimethyloctahydrocyclopenta[2,3]azeto[1,2-*a*]pyrrole (**3**)

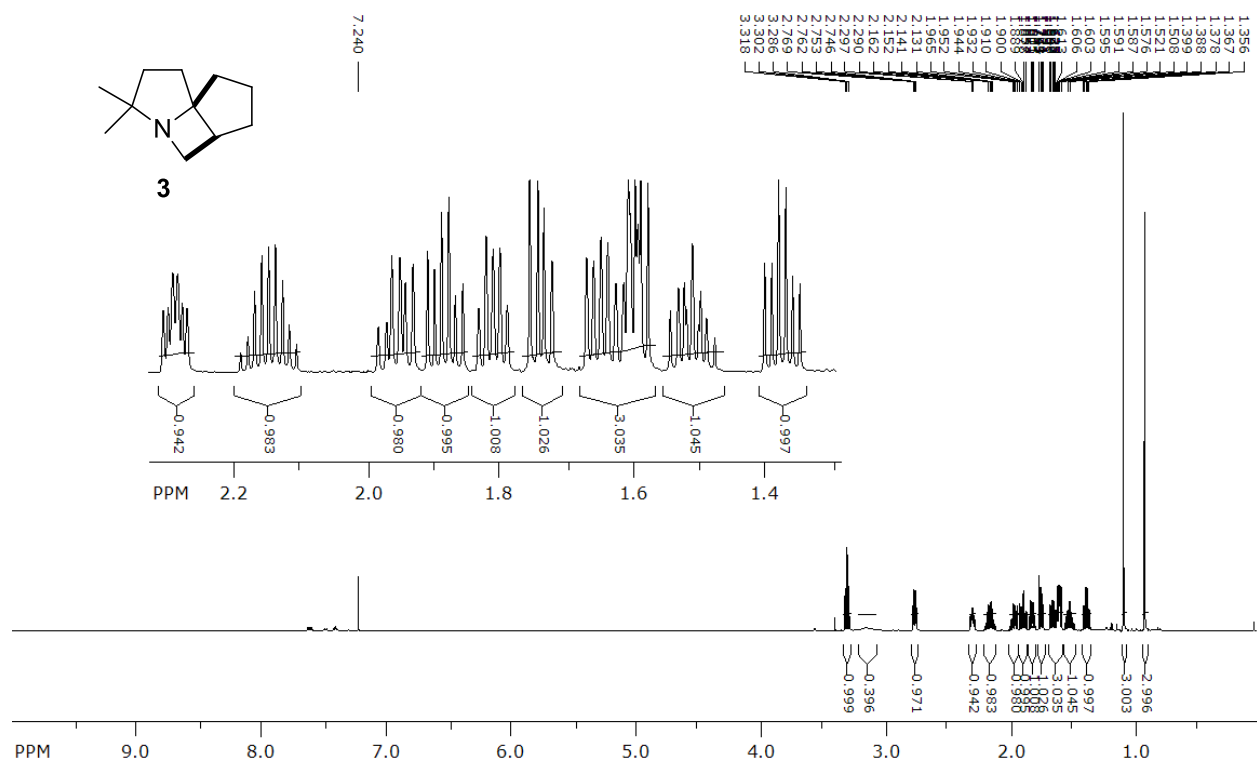

3.2 (5*aS*(*R*),8*aR*(*S*))-3,3-Dimethyloctahydro-1*H*-cyclopenta[2,3]azeto[1,2-*a*]pyrrol-4-ium bromide (**3**×**HBr**)

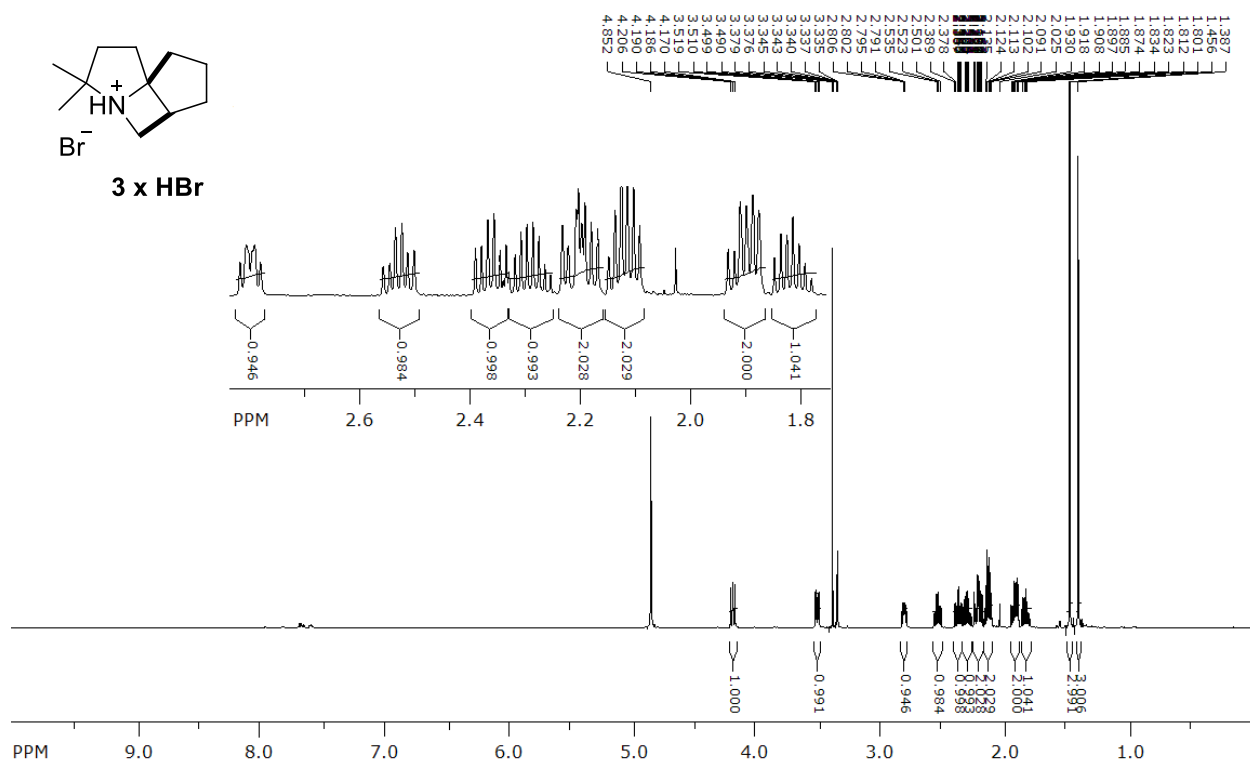

**Figure S15.** <sup>1</sup>H NMR spectrum of **3**×**HBr** in CD<sub>3</sub>OD at 600 MHz

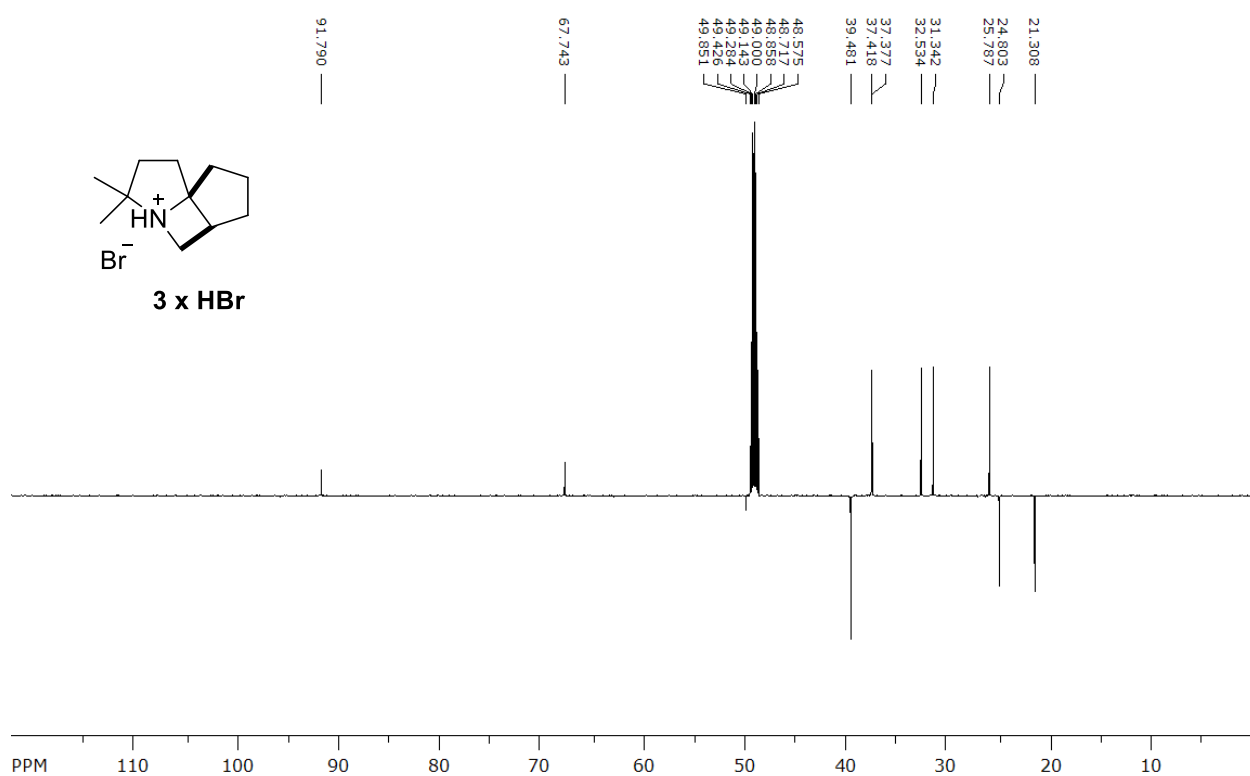

**Figure S16.** <sup>13</sup>C NMR spectrum of **3**×**HBr** in CD<sub>3</sub>OD at 150 MHz

3.3 ((5*R*(*S*),6*R*(*S*))-1-(Benzyloxy)-2,2-dimethyl-1-azaspiro[4.4]nonan-6-yl)-methanol (**1c**)

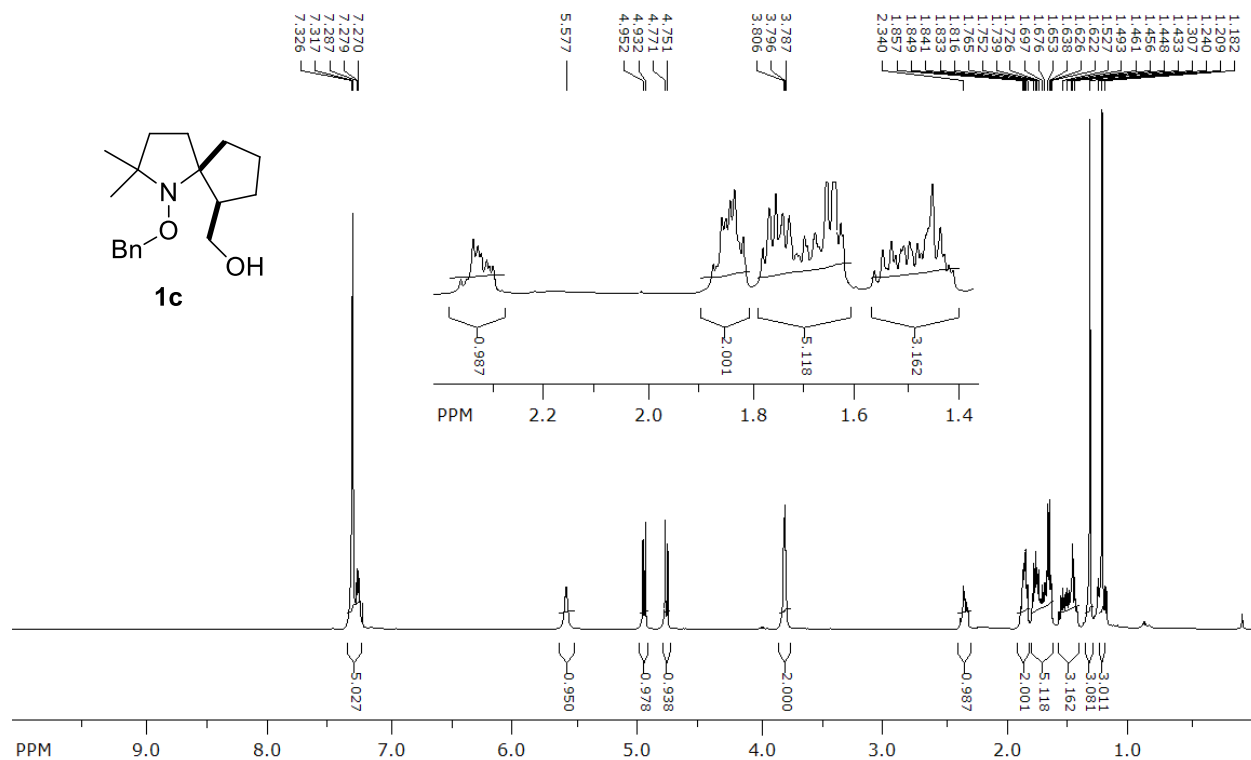

**Figure S17.** <sup>1</sup>H NMR spectrum of **1c** in CDCl<sub>3</sub> at 500 MHz

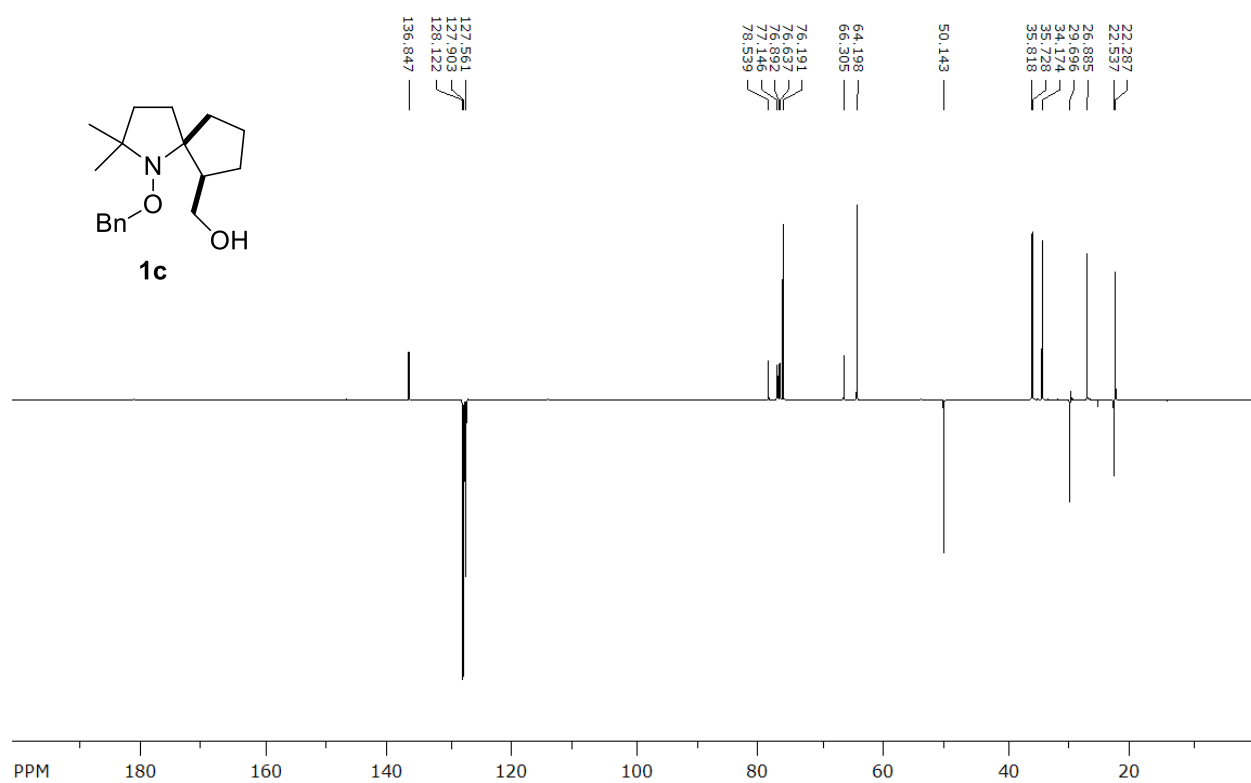

**Figure S18.** <sup>13</sup>C NMR spectrum of **1c** in CDCl<sub>3</sub> at 125 MHz

3.4 2-(Benzyloxy)-3,3-dimethyl-1,2,3,4,5,7,8,8a-octahydrocyclopenta[*c*]azepine (**4c**)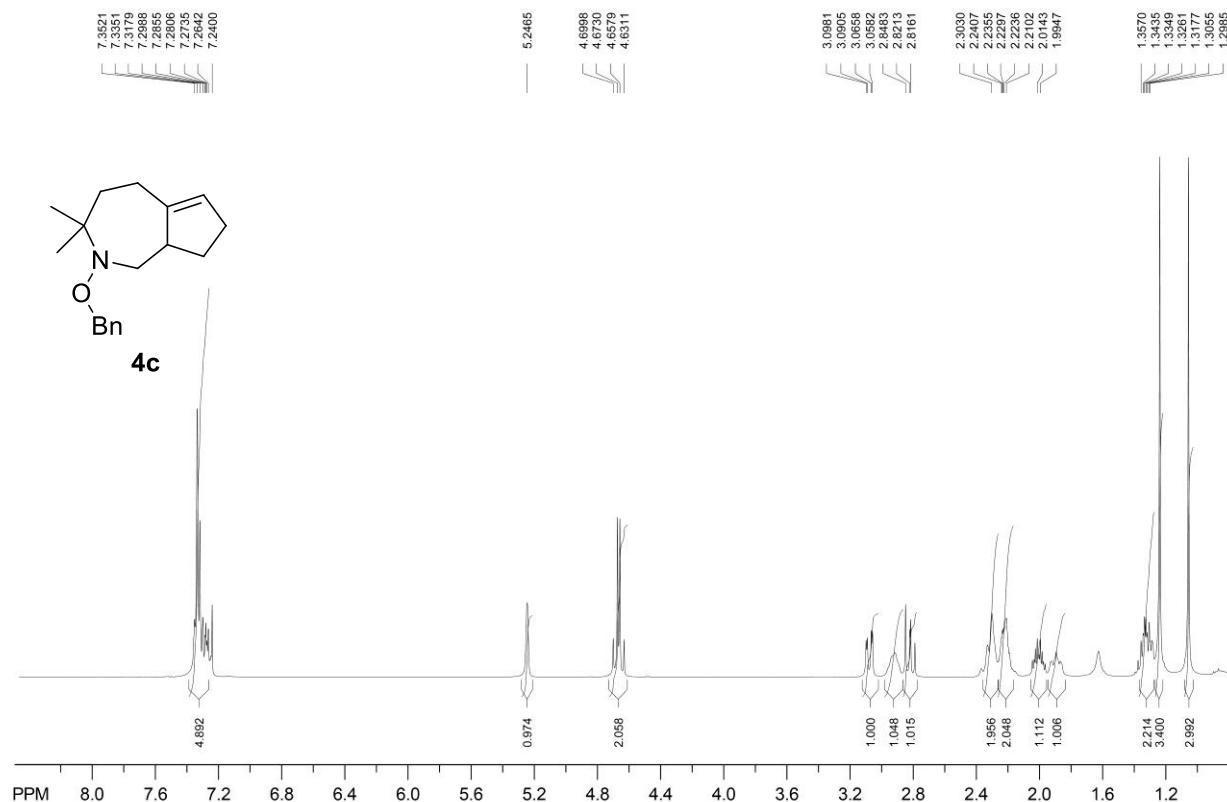

**Figure S19.**  $^1\text{H}$  NMR spectrum of **4c** in  $\text{CDCl}_3$  at 400 MHz

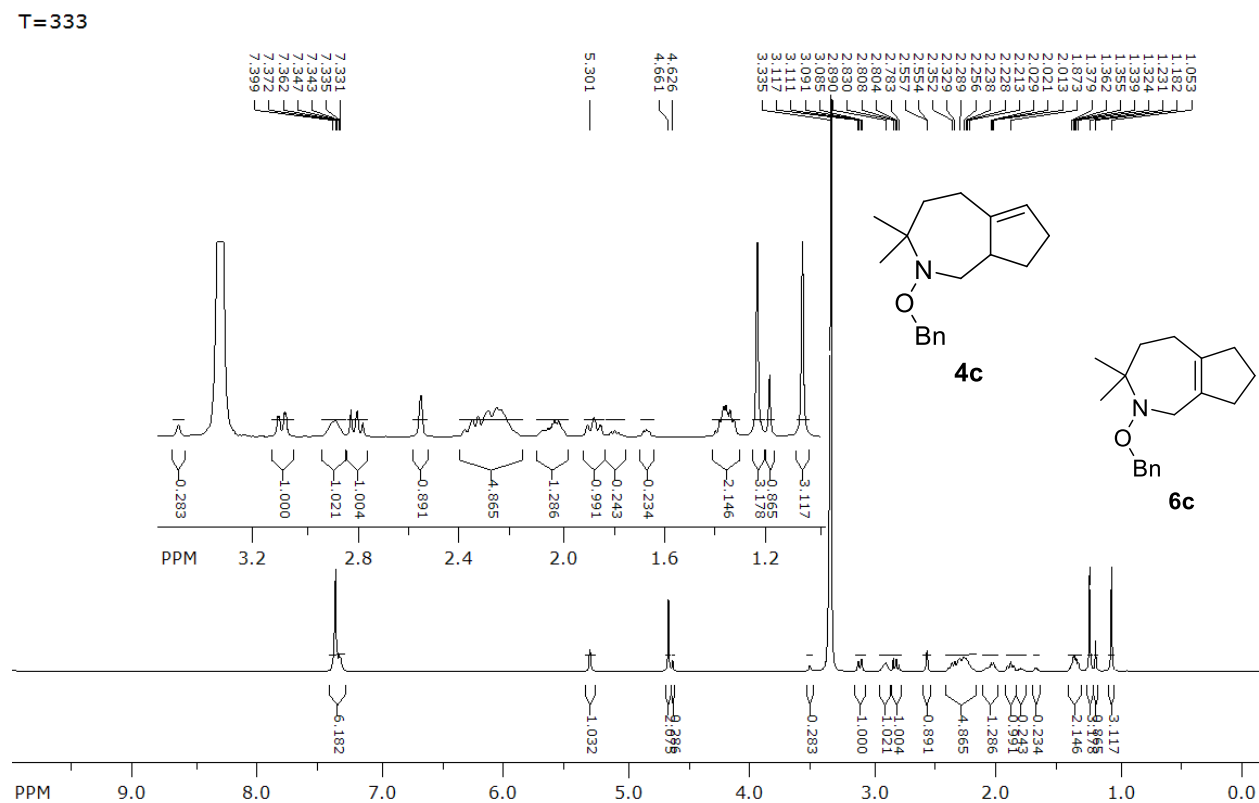

**Figure S20.**  $^1\text{H}$  NMR spectrum of **4c** and **6c** mixture in DMSO- $d_6$  at 500 MHz (T=333 K)

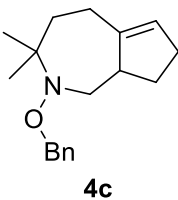
$$T = 333$$
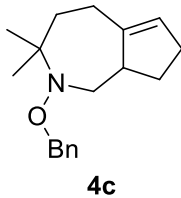

**Figure S22.**  $^{13}\text{C}$  NMR spectrum of **4c** and **6c** mixture in DMSO- $d_6$  at 125 MHz (T=333 K)

$$T = 333 \text{ K}$$
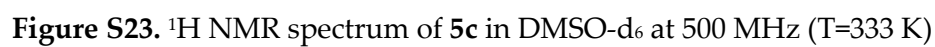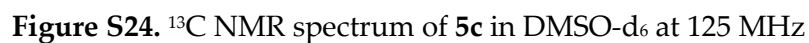

3.6 (5*R*),6*R*(*S*))-6-(Hydroxymethyl)-2,2-dimethyl-1-azaspiro[4.4]nonan-1-yl benzoate (**1d**)

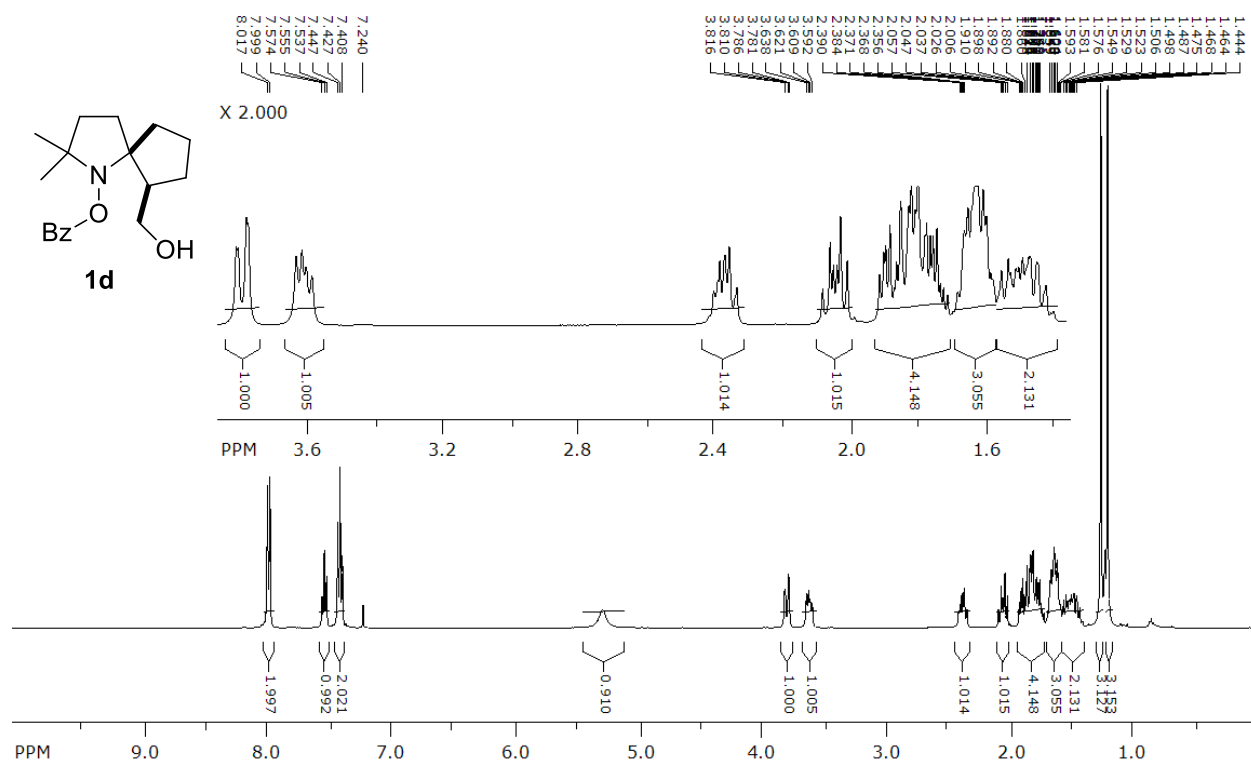

Figure S25. <sup>1</sup>H NMR spectrum of **1d** in CDCl<sub>3</sub> at 400 MHz

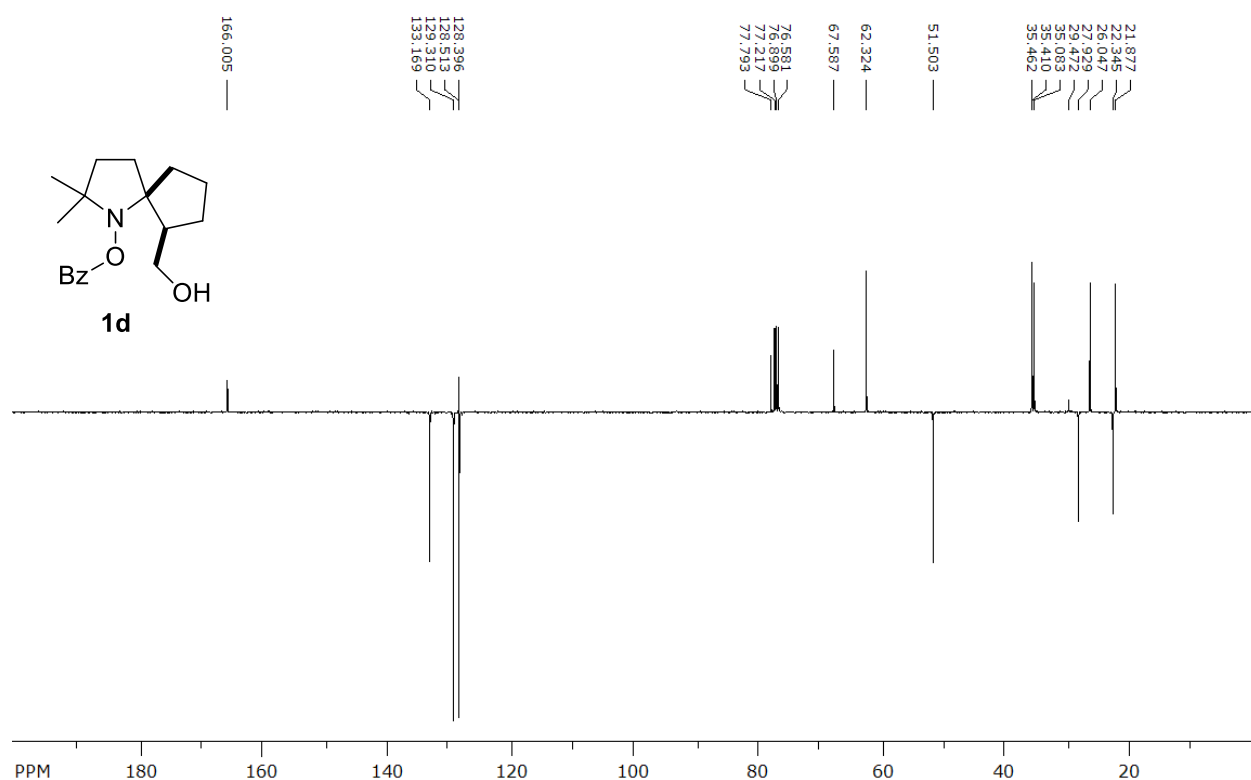

Figure S26. <sup>13</sup>C NMR spectrum of **1d** in CDCl<sub>3</sub> at 100 MHz



3.7 3,3-Dimethyl-1,4,5,7,8,8a-hexahydrocyclopenta[*c*]azepin-2(*3H*)-yl benzoate (**4d**)

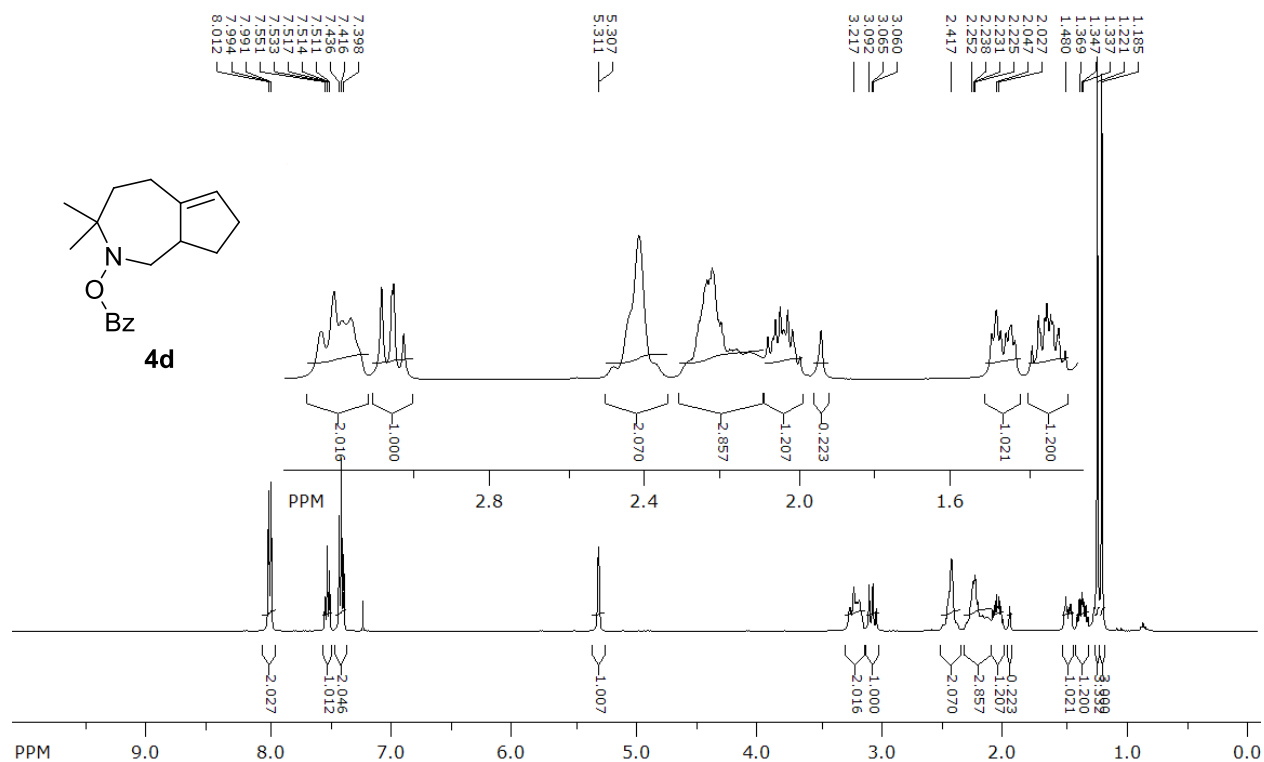

Figure S27. <sup>1</sup>H NMR spectrum of **4d** in CDCl<sub>3</sub> at 400 MHz

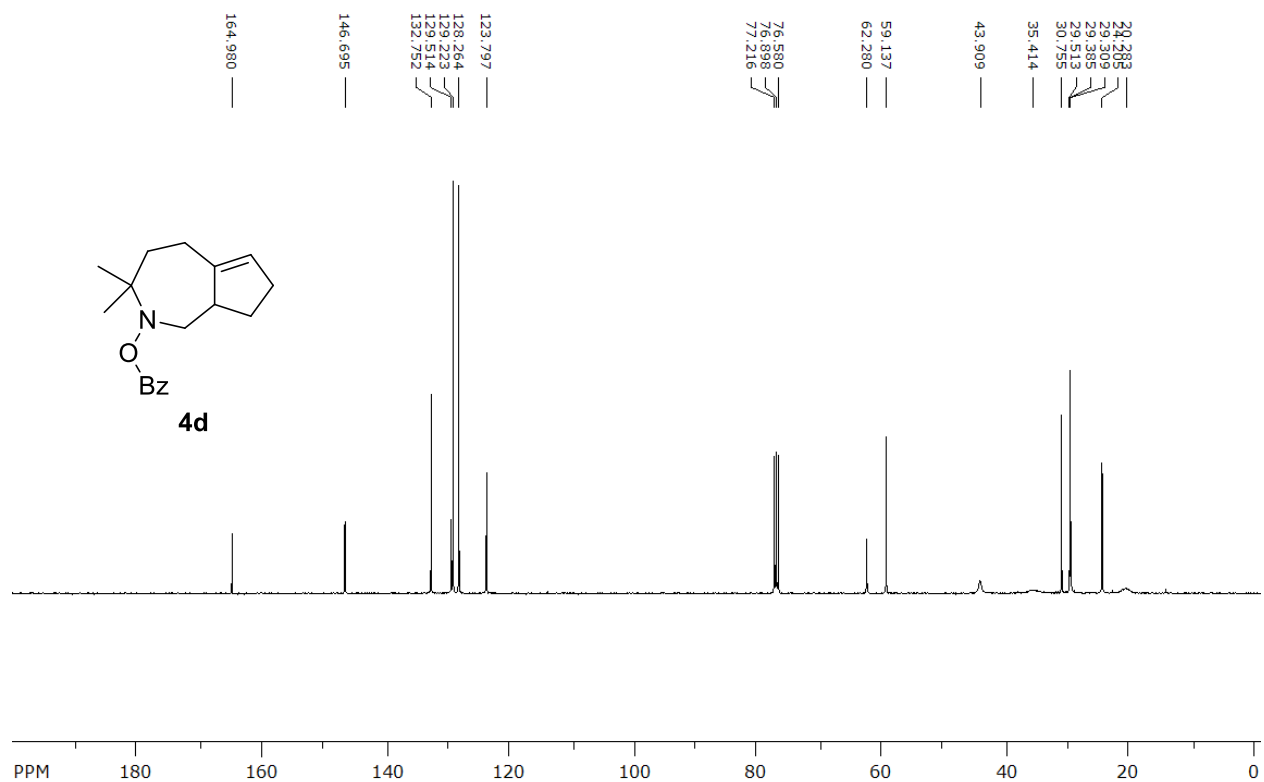

Figure S28. <sup>13</sup>C NMR spectrum of **4d** in CDCl<sub>3</sub> at 100 MHz

### 3.8 3,3-Dimethyl-3,4,6,7,8,8a-hexahydrocyclopenta[c]azepin-2(1H)-yl benzoate (**5d**)

T = 333 K

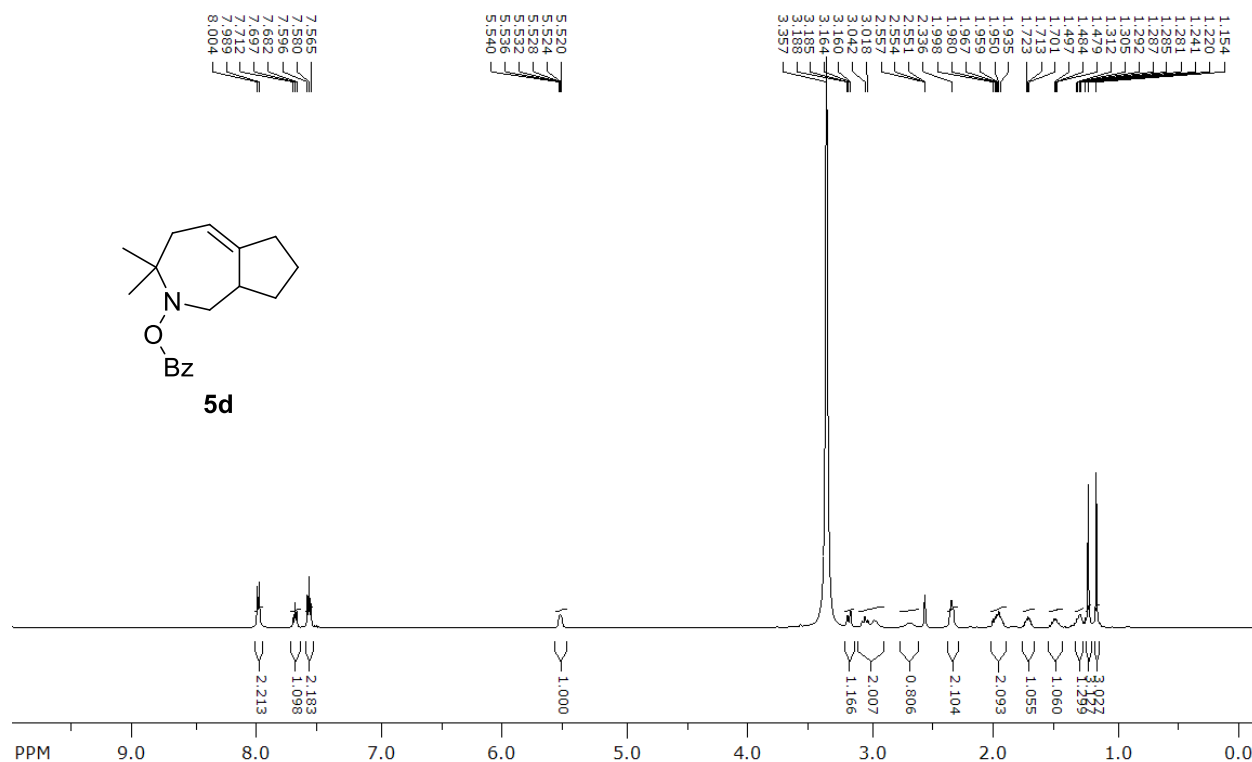

**Figure S29.** <sup>1</sup>H NMR spectrum of **5d** in DMSO-d<sub>6</sub> at 500 MHz (T=333 K)

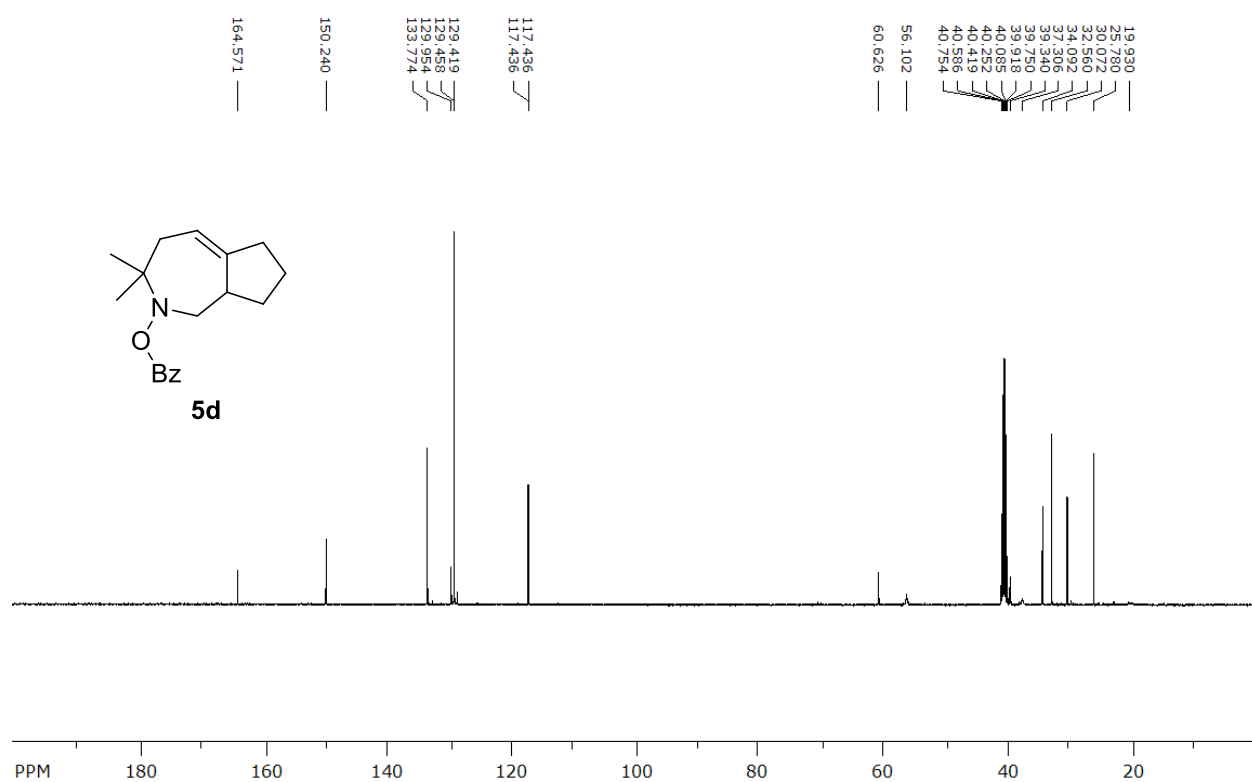

**Figure S30.** <sup>13</sup>C NMR spectrum of **5d** in DMSO-d<sub>6</sub> at 125 MHz (T=333 K)

3.9 (5*R*(*S*),6*R*(*S*))-6-((Benzoyloxy)methyl)-2,2-dimethyl-1-azaspiro[4.4]nonan-1-ium 2,2,2-trifluoroacetate (**14**)

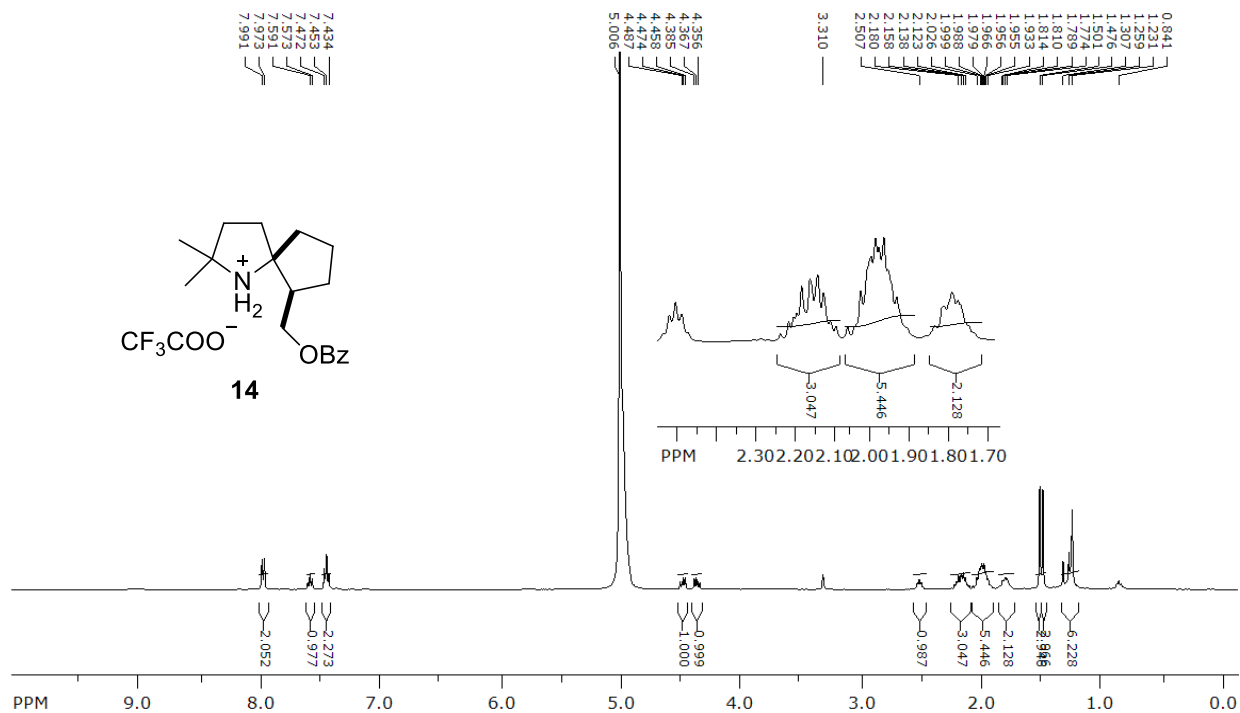

**Figure S31.**  $^1\text{H}$  NMR spectrum of **14** in  $\text{CDCl}_3\text{-CD}_3\text{OD-CF}_3\text{COOH}$  mixture at 400 MHz

3.10 (5a*S*(*R*),8a*R*(*S*))-3,3,4-Trimethyloctahydro-1*H*-cyclopenta[2,3]azeto[1,2-*a*]pyrrol-4-ium iodide (**15**)

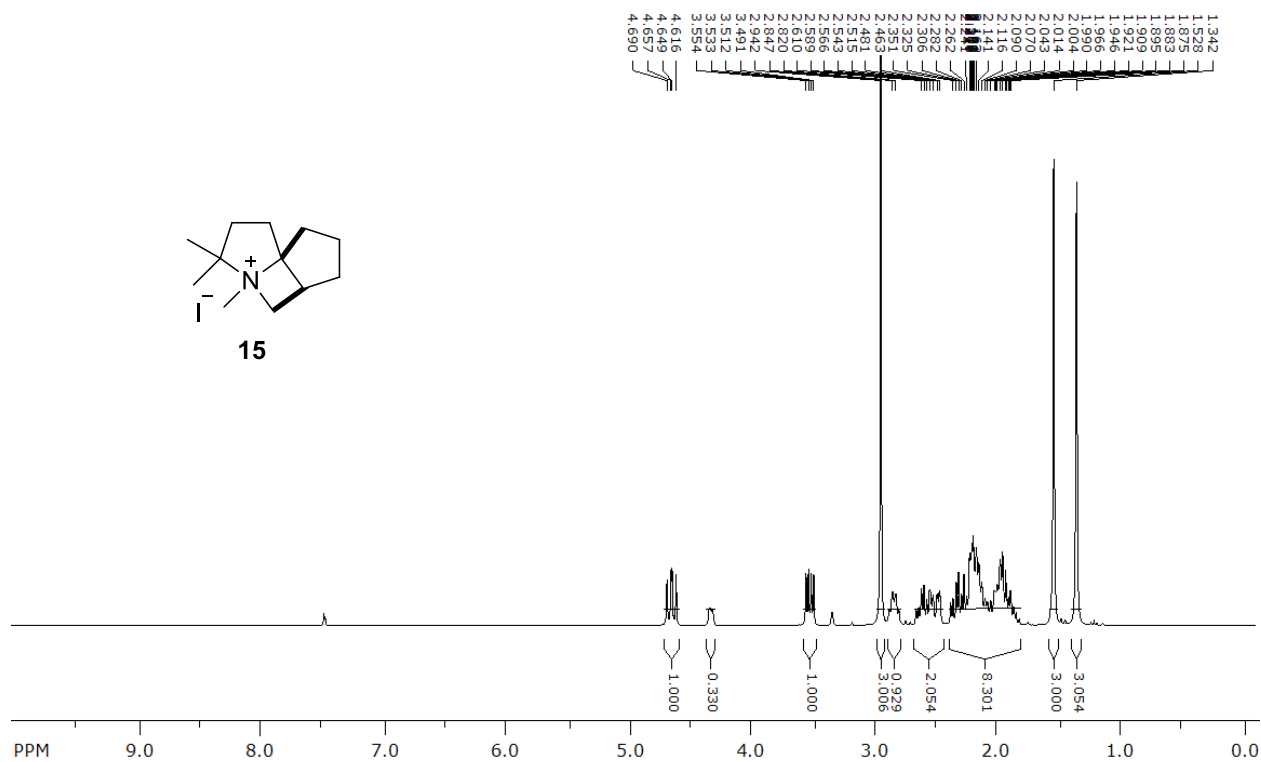

**Figure S32.**  $^1\text{H}$  NMR spectrum of **15** in  $\text{CDCl}_3\text{-CD}_3\text{OD}$  mixture at 300 MHz



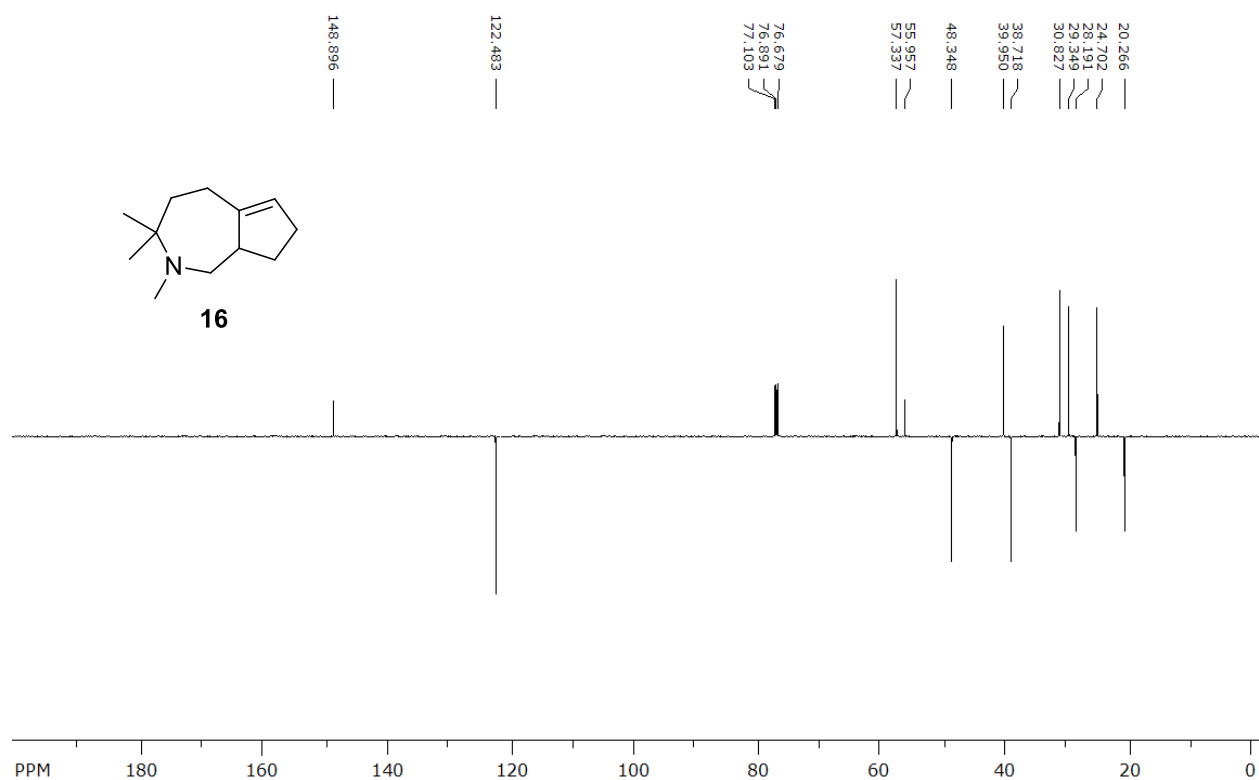

**Figure S35.** <sup>13</sup>C NMR spectrum of **15** in CDCl<sub>3</sub> at 150 MHz.

4. 2D NMR spectral data.

4.1 (5a*S*),8a*R*(*S*))-3,3-Dimethyloctahydrocyclopenta[2,3]azeto[1,2-*a*]pyrrole (**3**)

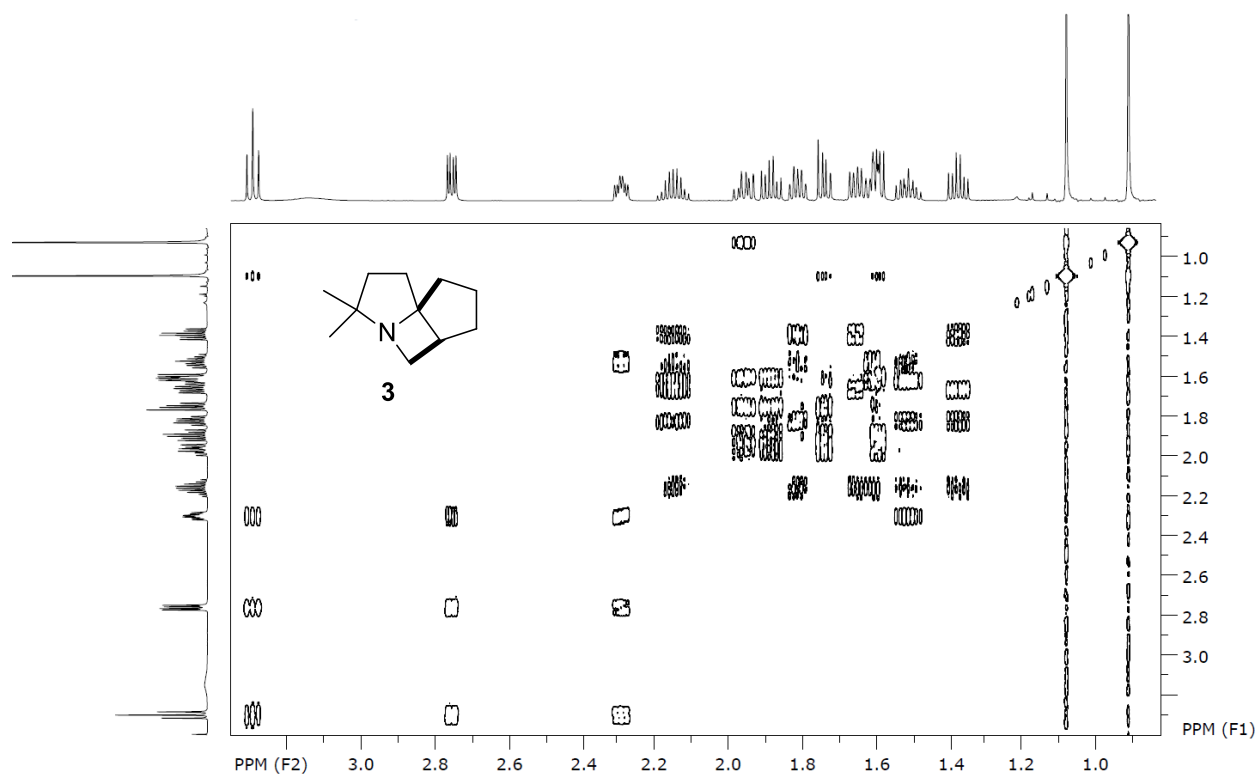

**Figure S36.** <sup>1</sup>H-<sup>1</sup>H COSY NMR spectrum of **3** in CDCl<sub>3</sub>.

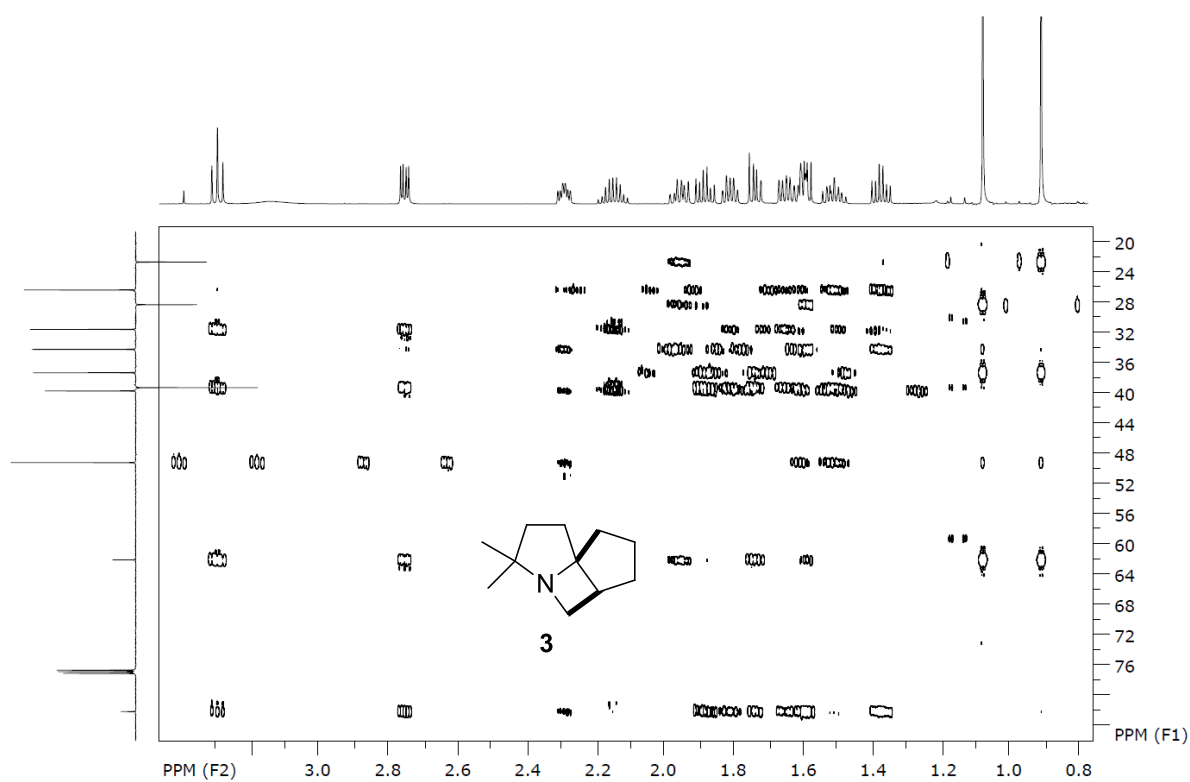

**Figure S37.**  $^1\text{H}$ - $^{13}\text{C}$  HMBC NMR spectrum of **3** in  $\text{CDCl}_3$ .

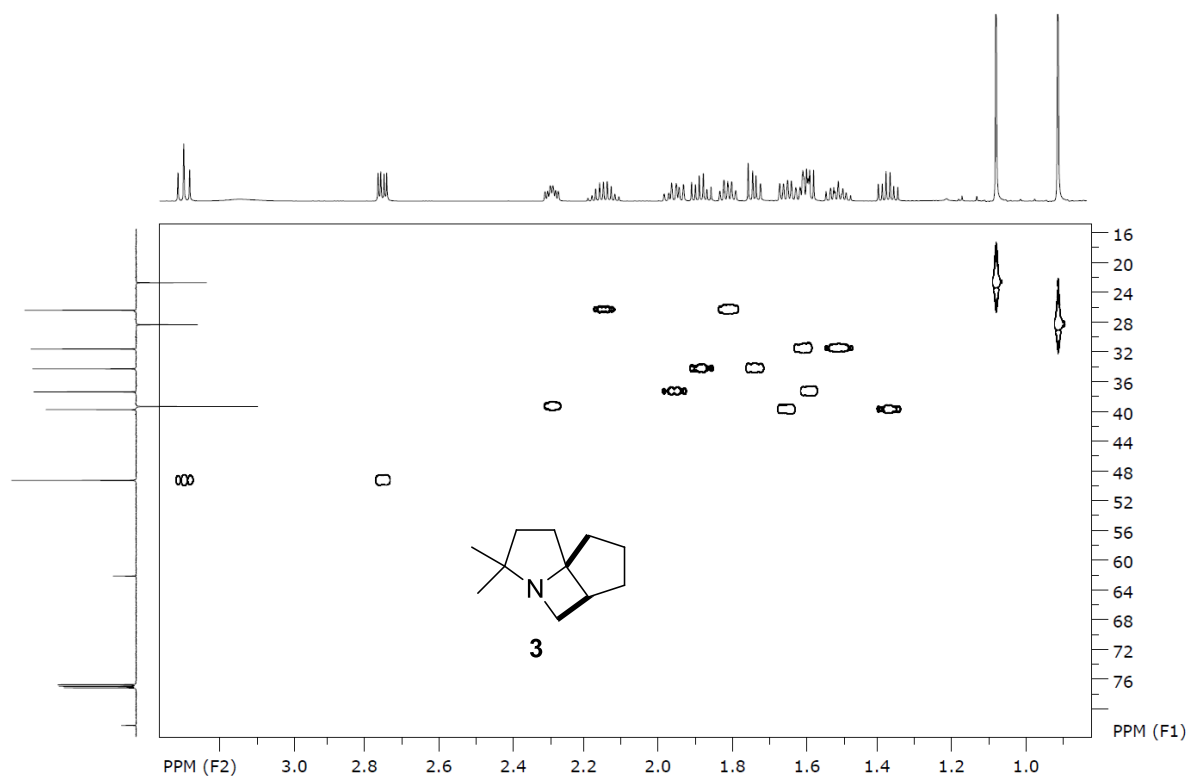

**Figure S38.**  $^1\text{H}$ - $^{13}\text{C}$  HSQC NMR spectrum of **3** in  $\text{CDCl}_3$ .

4.2 (5a*S*(*R*),8a*R*(*S*))-3,3-Dimethyloctahydro-1*H*-cyclopenta[2,3]azeto[1,2-*a*]pyrrol-4-ium bromide (3×HBr)

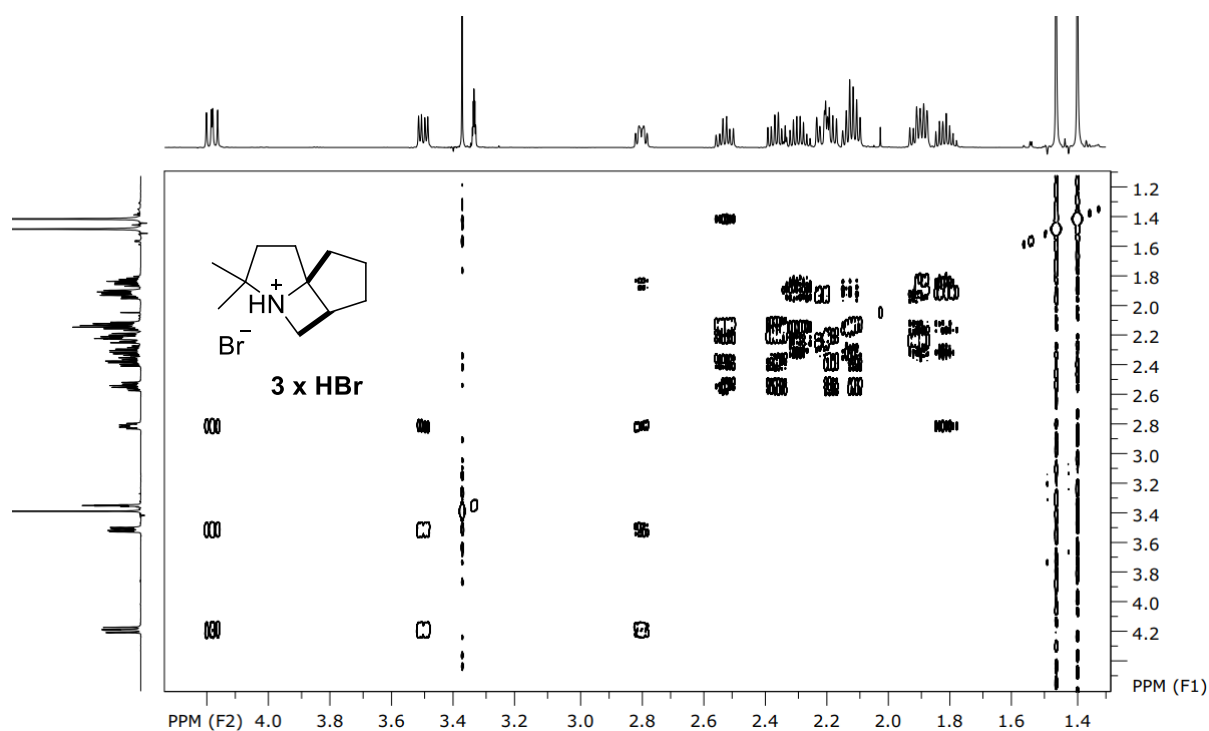

Figure S39.  $^1\text{H}$ - $^1\text{H}$  COSY NMR spectrum of 3×HBr in  $\text{CD}_3\text{OD}$

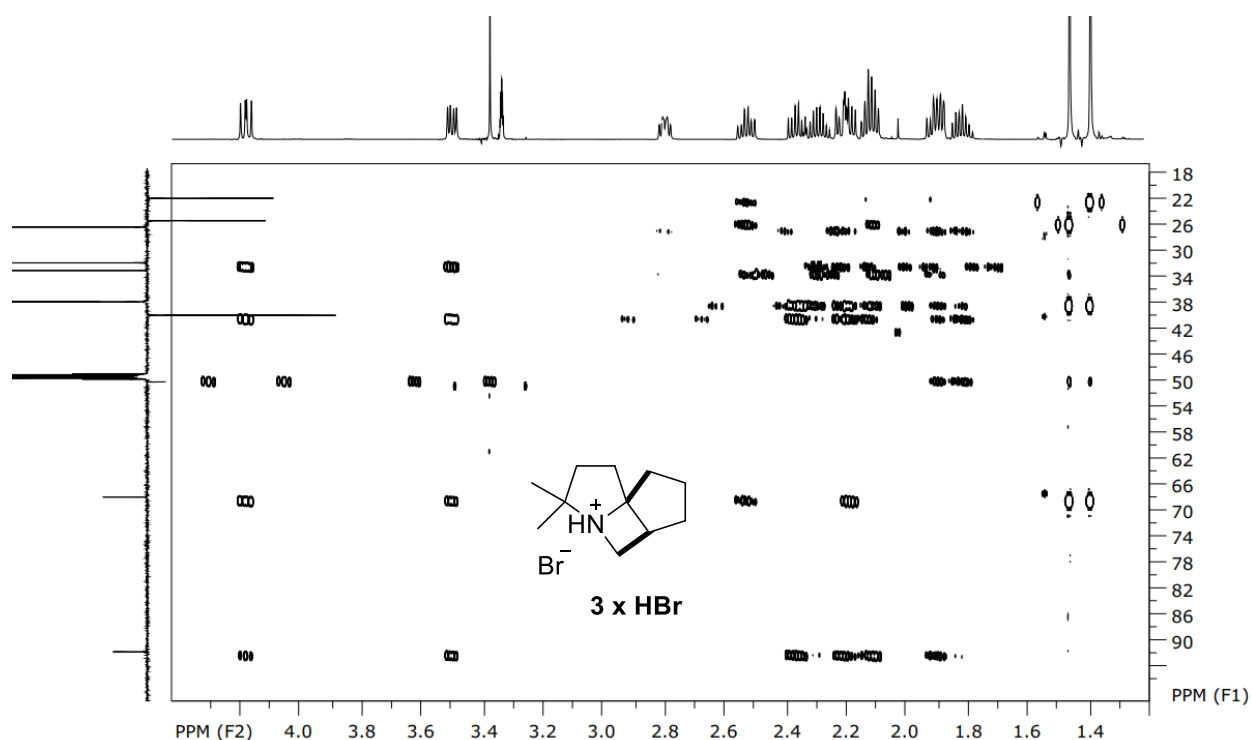

Figure S40.  $^1\text{H}$ - $^{13}\text{C}$  HMBC NMR spectrum of 3×HBr in  $\text{CD}_3\text{OD}$

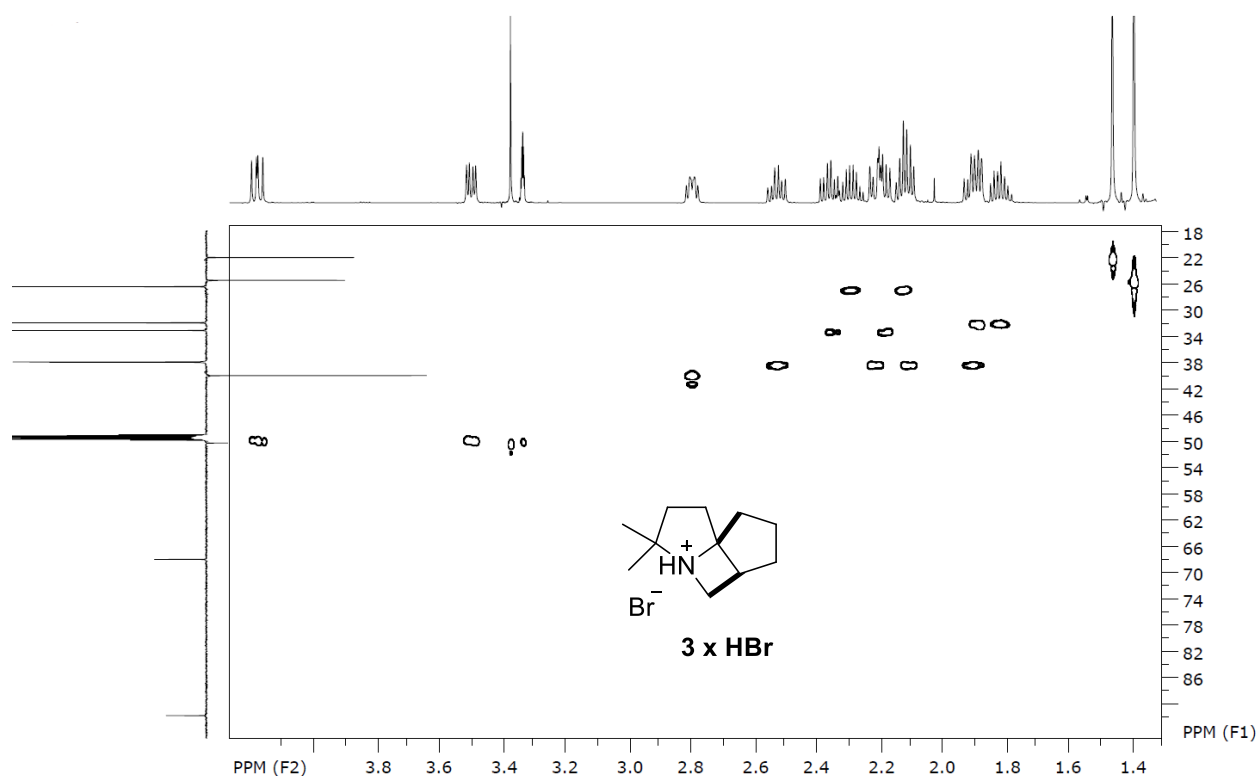

**Figure S41.**  $^1\text{H}$ - $^{13}\text{C}$  HSQC NMR spectrum of **3xHBr** in  $\text{CD}_3\text{OD}$

#### 4.3 2-(Benzyloxy)-3,3-dimethyl-1,2,3,4,5,7,8,8a-octahydrocyclopenta[*c*]azepine (**4c**)

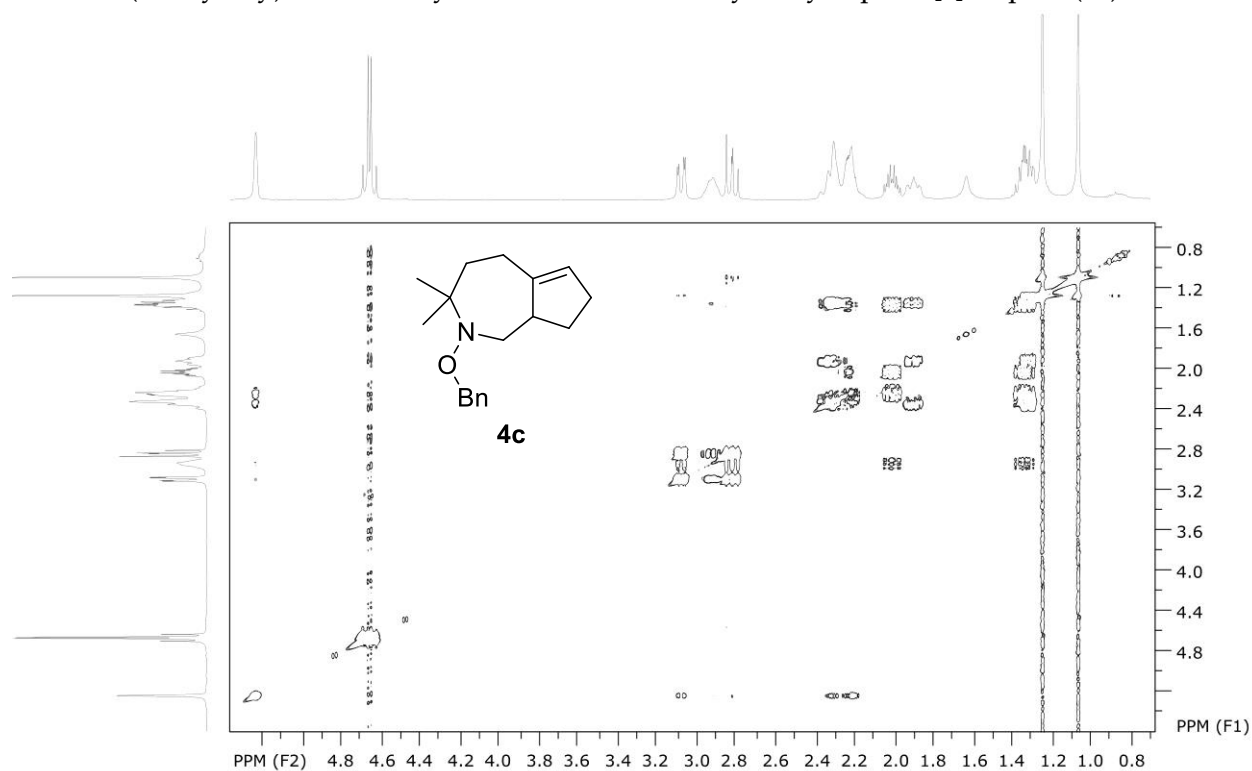

**Figure S42.**  $^1\text{H}$ - $^1\text{H}$  COSY NMR spectrum of **4c** in  $\text{CDCl}_3$



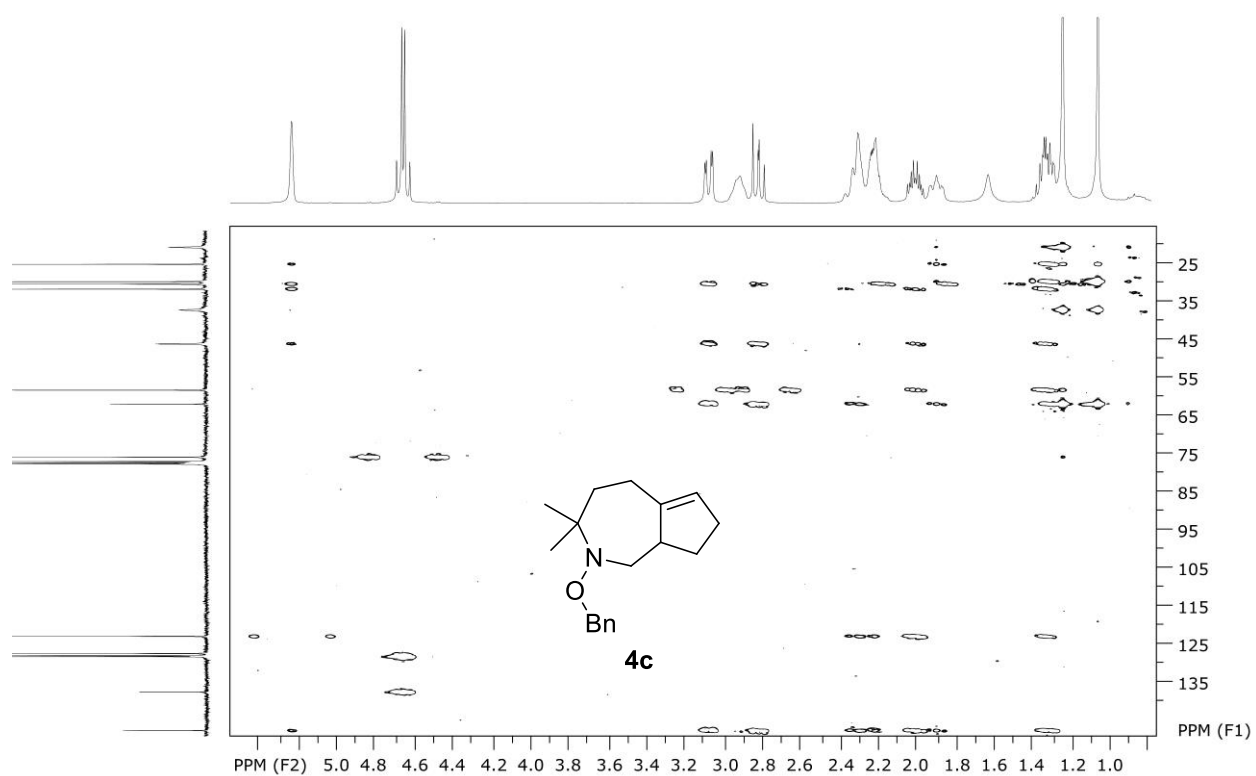

**Figure S43.**  $^1\text{H}$ - $^{13}\text{C}$  HMBC NMR spectrum of **4c** in  $\text{CDCl}_3$

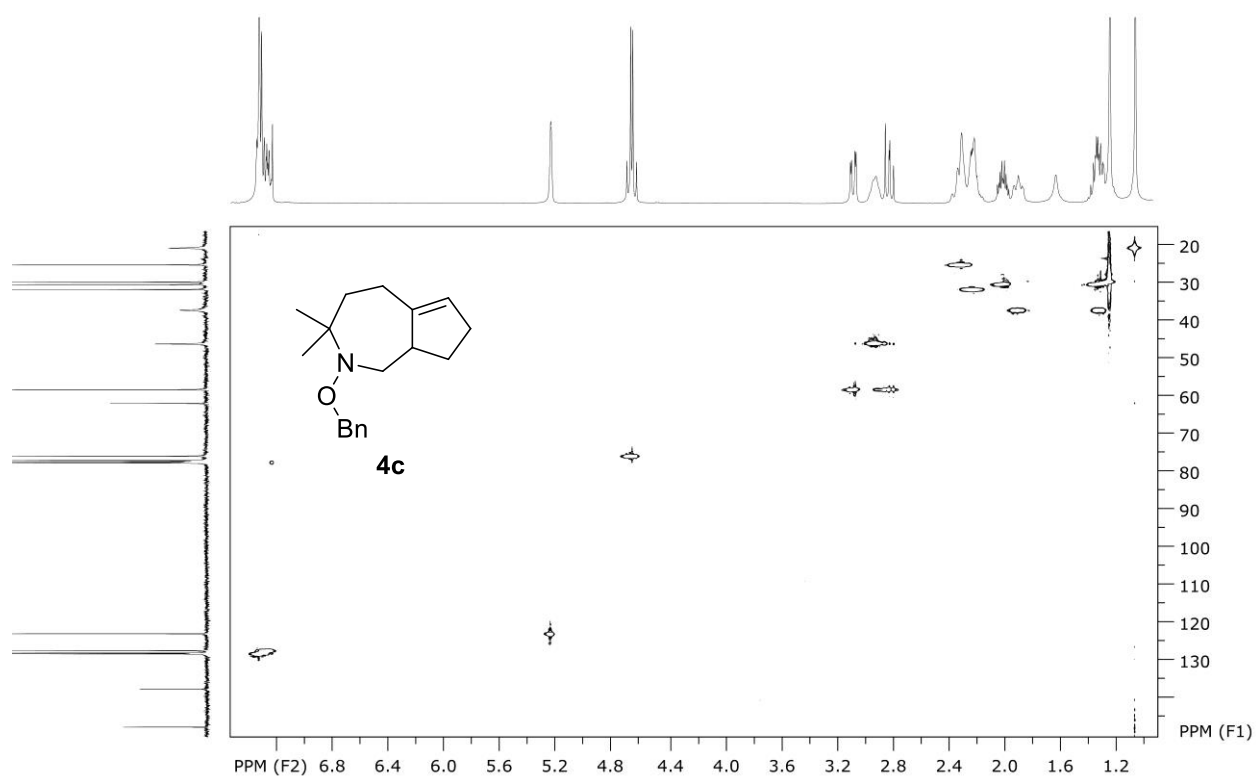

**Figure S44.**  $^1\text{H}$ - $^{13}\text{C}$  HSQC NMR spectrum of **4c** in  $\text{CDCl}_3$

4.4 2-(Benzyloxy)-3,3-dimethyl-1,2,3,4,6,7,8,8a-octahydrocyclopenta[c]azepine (**5c**)

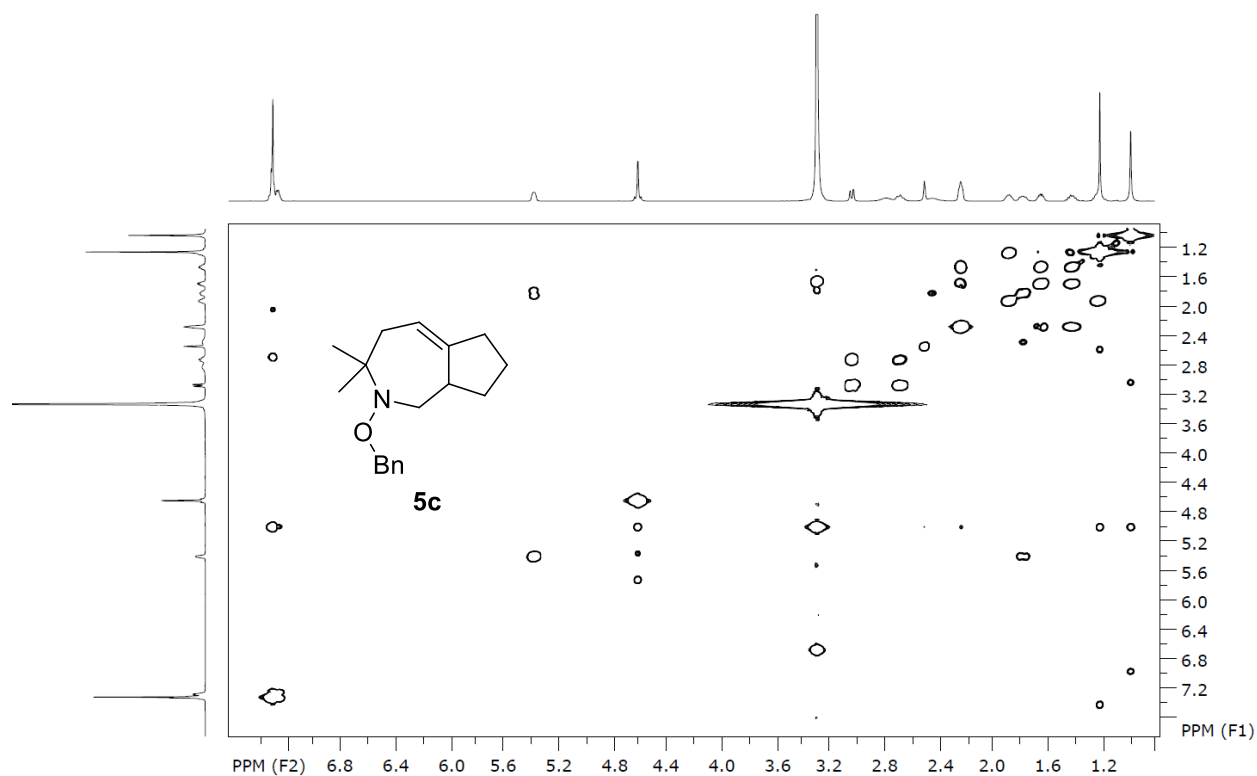

Figure S45.  $^1\text{H}$ - $^1\text{H}$  COSY NMR spectrum of **5c** in  $\text{DMSO-d}_6$  ( $T=333\text{ K}$ )

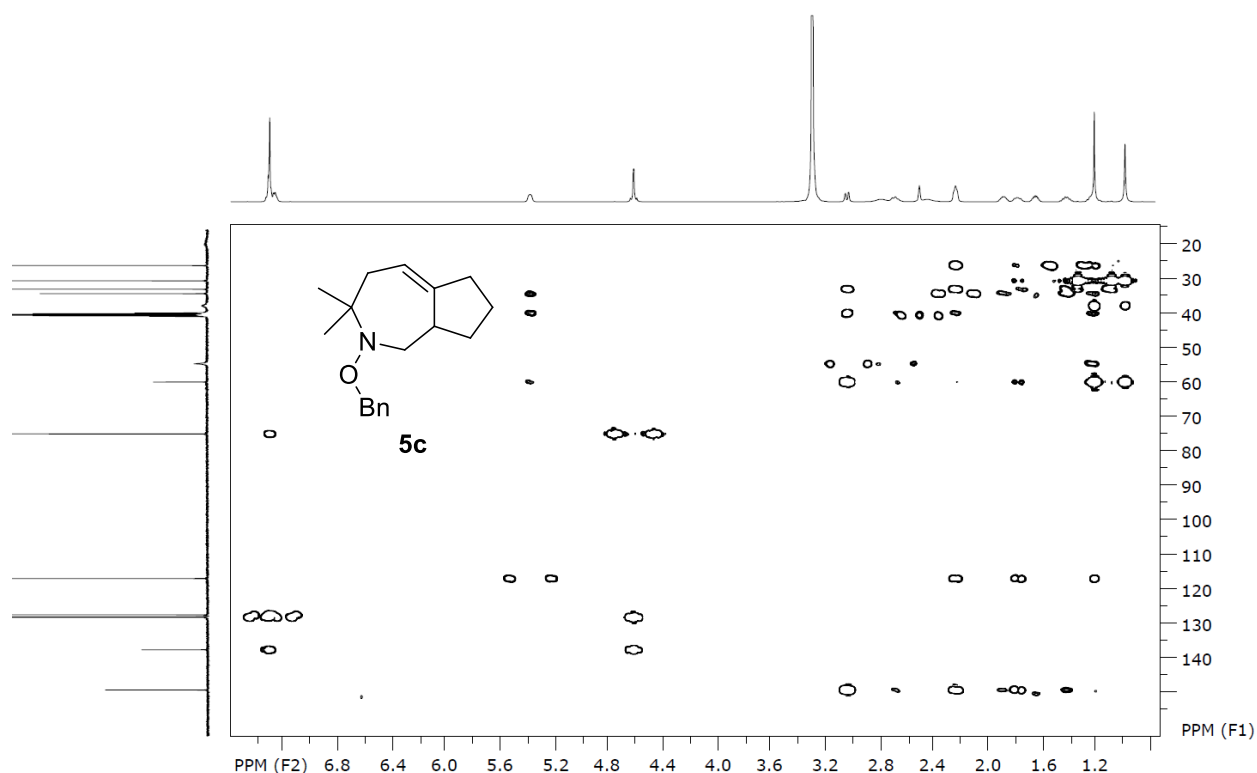

Figure S46.  $^1\text{H}$ - $^{13}\text{C}$  HMBC NMR spectrum of **5c** in  $\text{DMSO-d}_6$  ( $T=333\text{ K}$ )

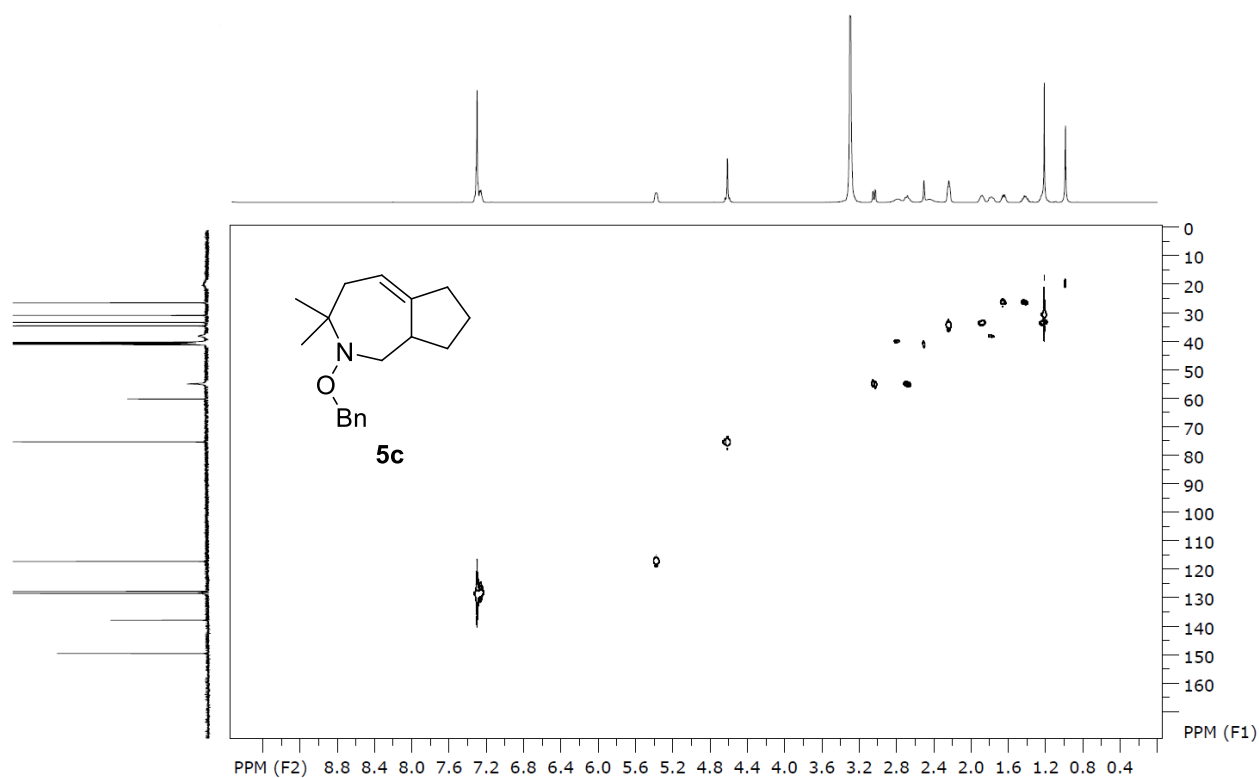

**Figure S47.**  $^1\text{H}$ - $^{13}\text{C}$  HSQC NMR spectrum of **5c** in  $\text{DMSO-d}_6$  ( $T=333\text{ K}$ )

#### 4.5 3,3-Dimethyl-1,4,5,7,8,8a-hexahydrocyclopenta[*c*]azepin-2(3*H*)-yl benzoate (**4d**)

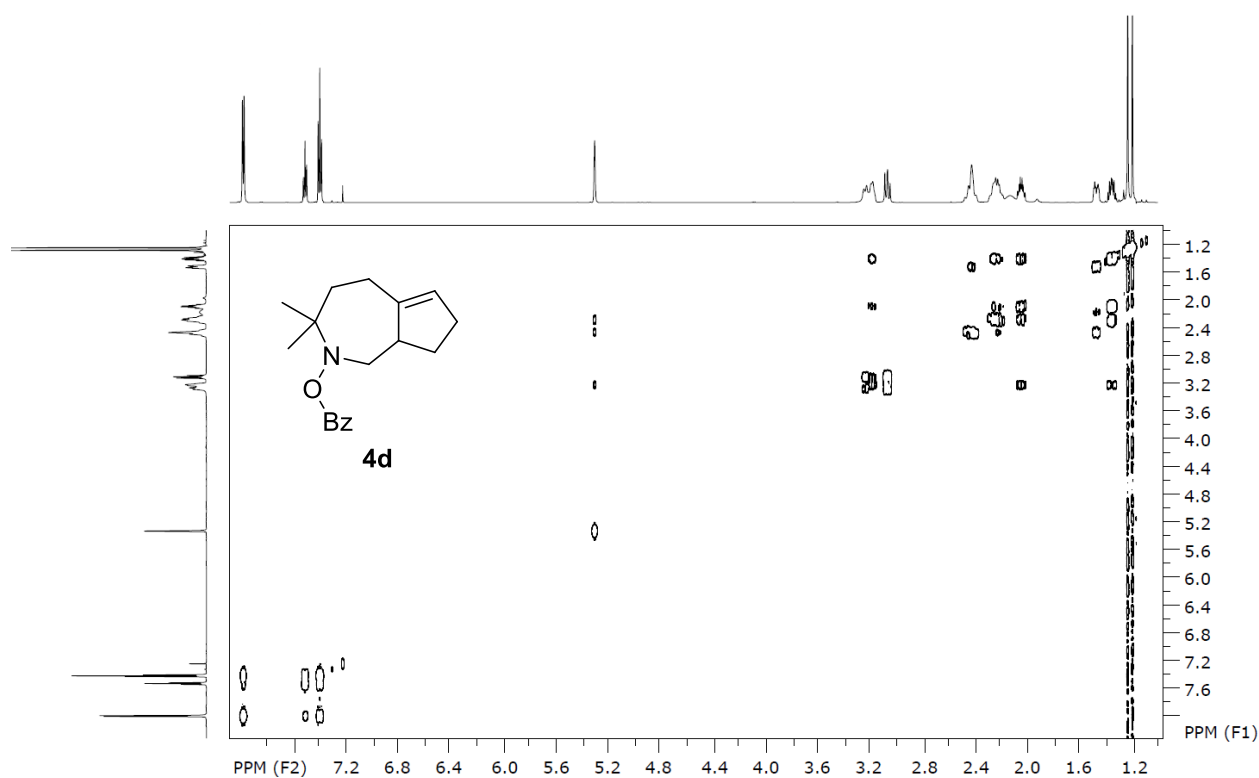

**Figure S48.**  $^1\text{H}$ - $^1\text{H}$  COSY NMR spectrum of **4d** in  $\text{CDCl}_3$

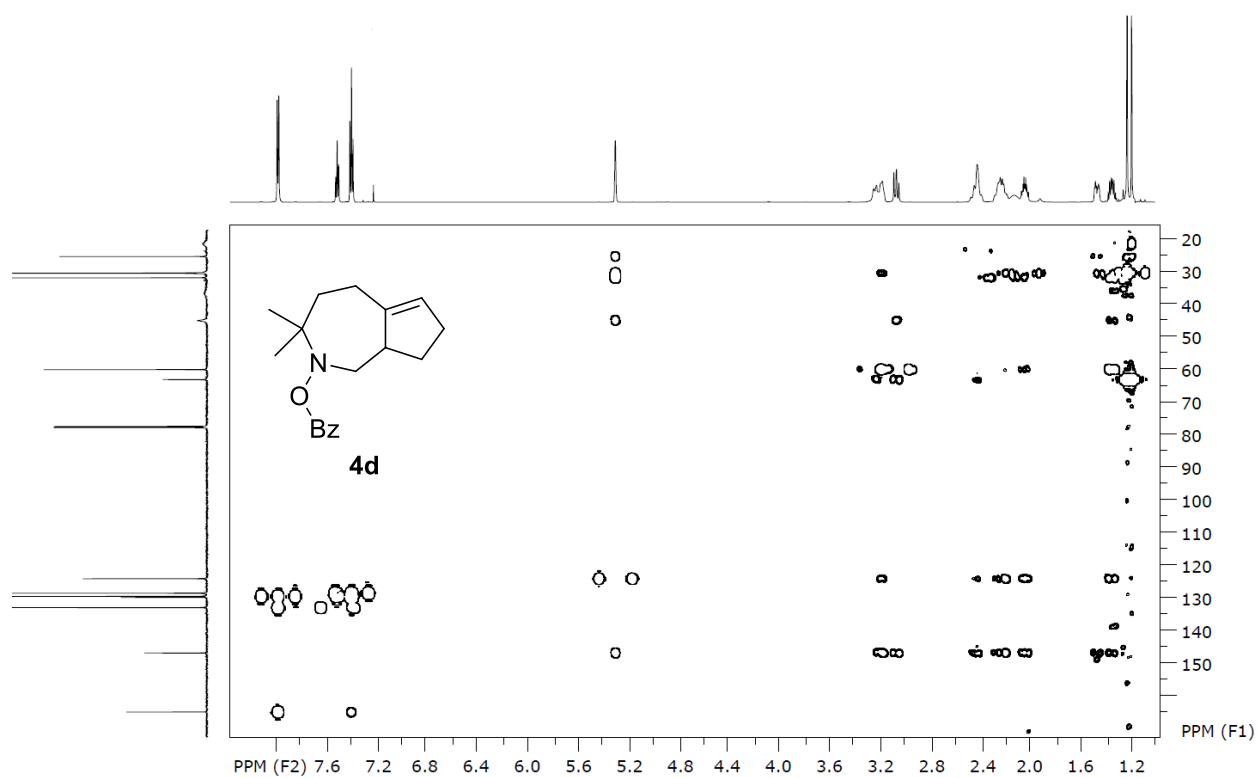

**Figure S49.**  $^1\text{H}$ - $^{13}\text{C}$  HMBC NMR spectrum of **4d** in  $\text{CDCl}_3$

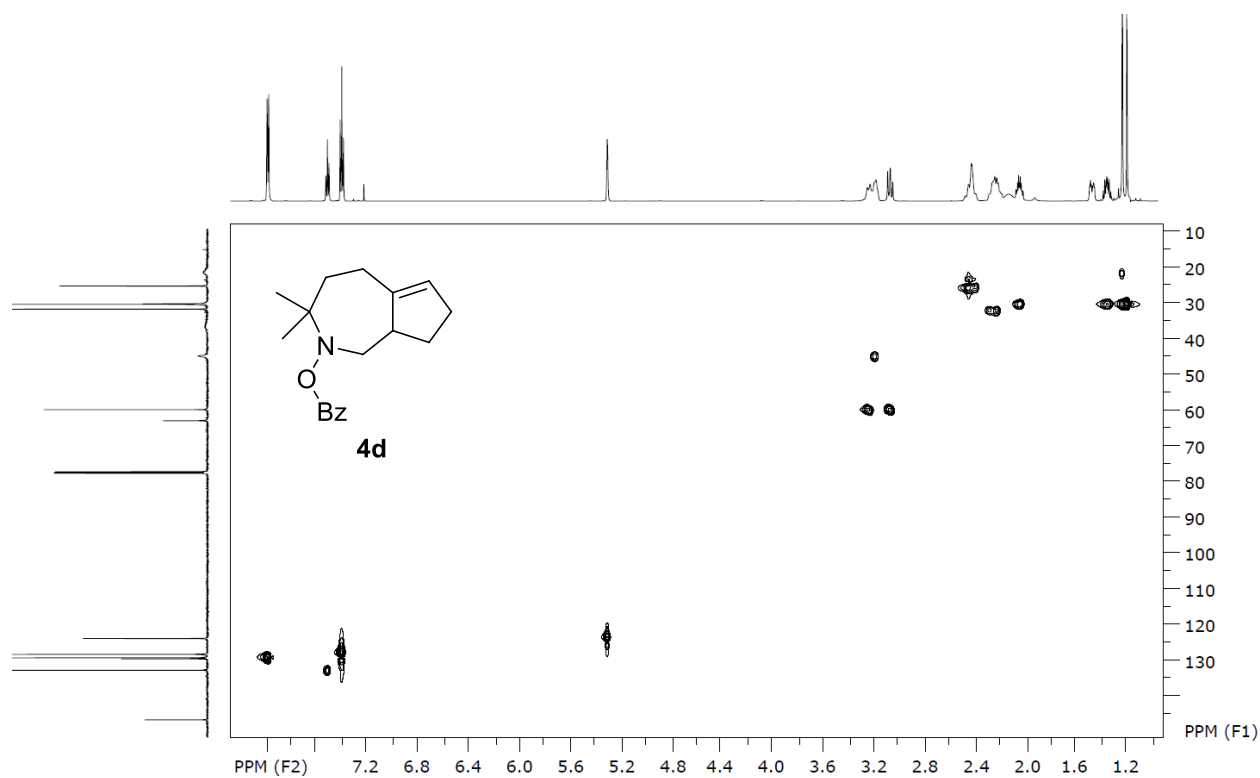

**Figure S50.**  $^1\text{H}$ - $^{13}\text{C}$  HSQC NMR spectrum of **4d** in  $\text{CDCl}_3$

4.6 3,3-Dimethyl-3,4,6,7,8,8a-hexahydrocyclopenta[*c*]azepin-2(1*H*)-yl benzoate (**5d**)

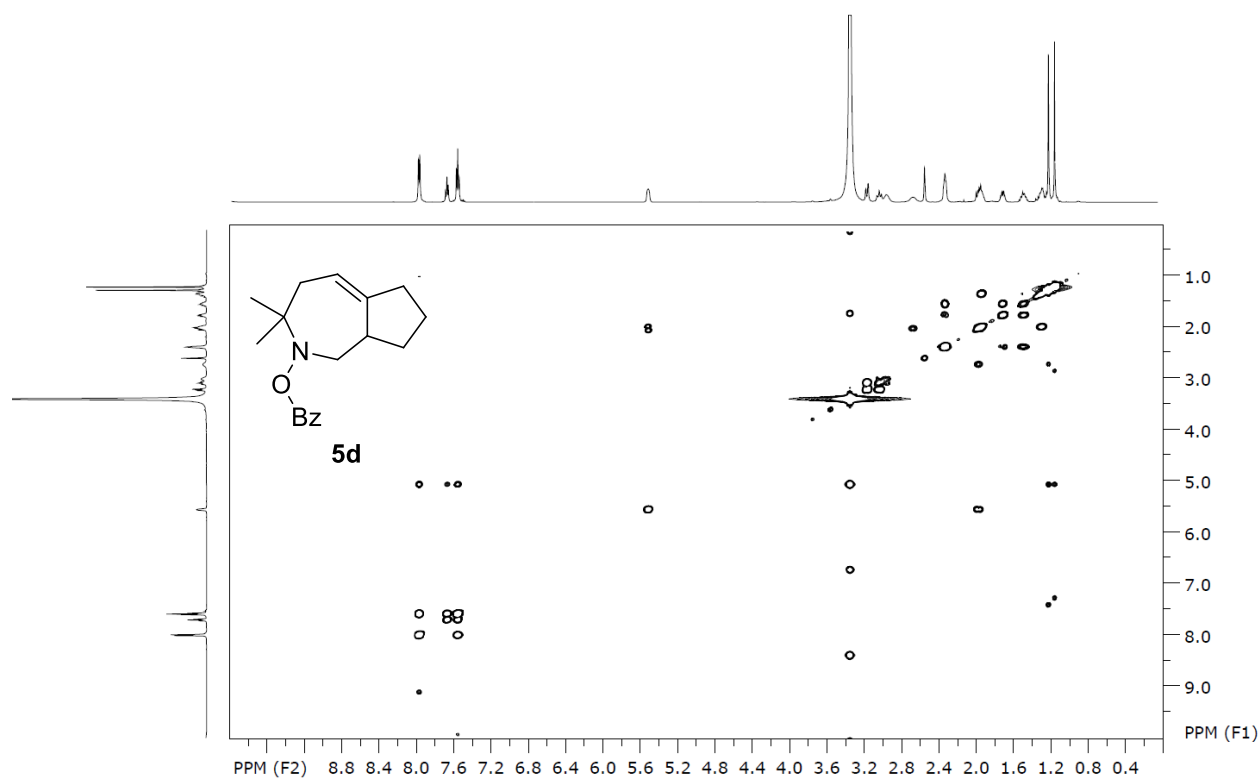

**Figure S51.**  $^1\text{H}$ - $^1\text{H}$  COSY NMR spectrum of **5d** in DMSO- $\text{d}_6$  (T=333 K)

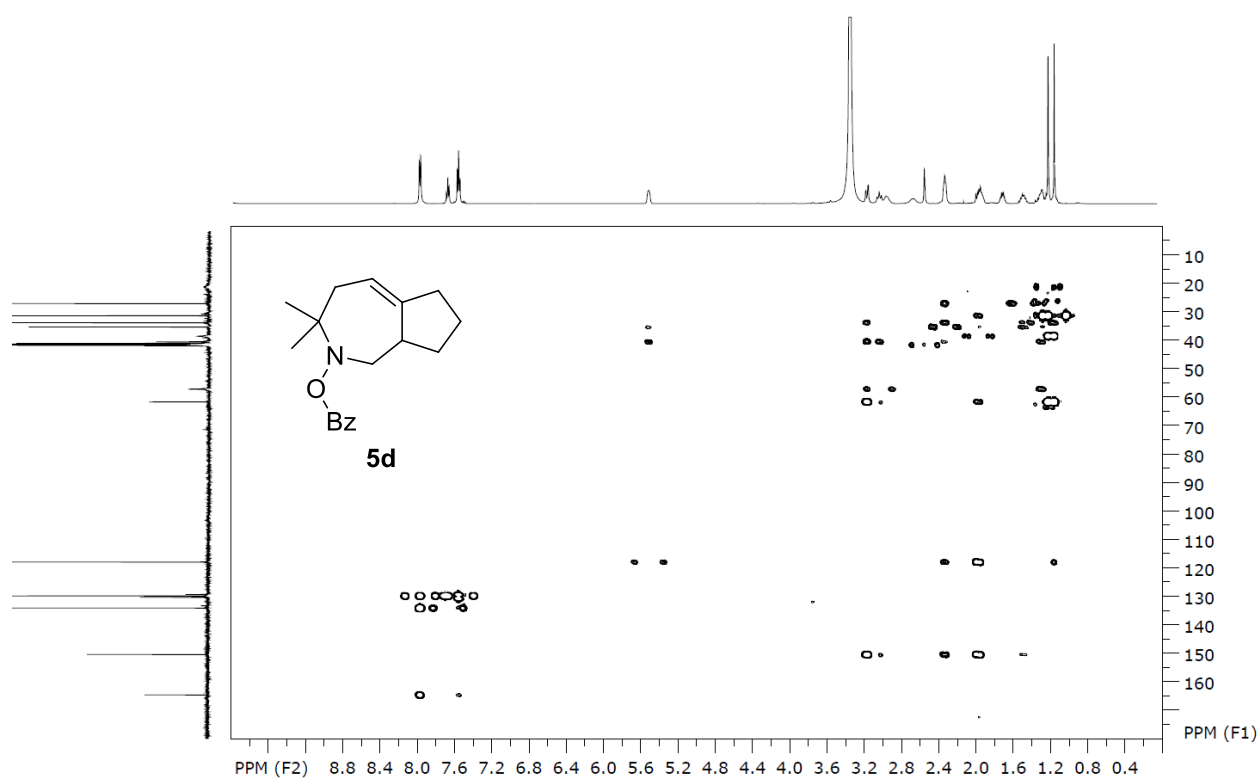

**Figure S52.**  $^1\text{H}$ - $^{13}\text{C}$  HMBC NMR spectrum of **5d** in DMSO- $\text{d}_6$  (T=333 K)

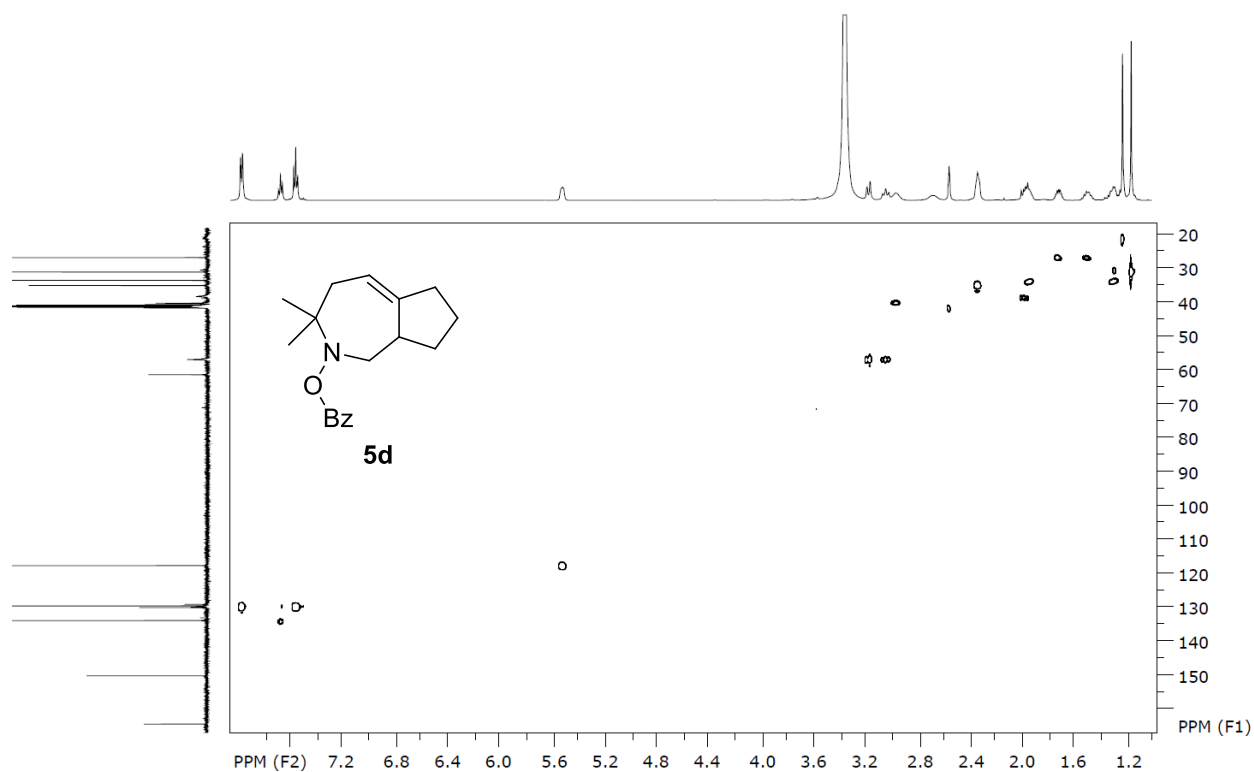

**Figure S53.**  $^1\text{H}$ - $^{13}\text{C}$  HSQC NMR spectrum of **5d** in  $\text{DMSO}-d_6$  ( $T=333\text{ K}$ )

#### 4.7 2,3,3-Trimethyl-1,2,3,4,5,7,8,8a-octahydrocyclopenta[*c*]azepine (**16**)

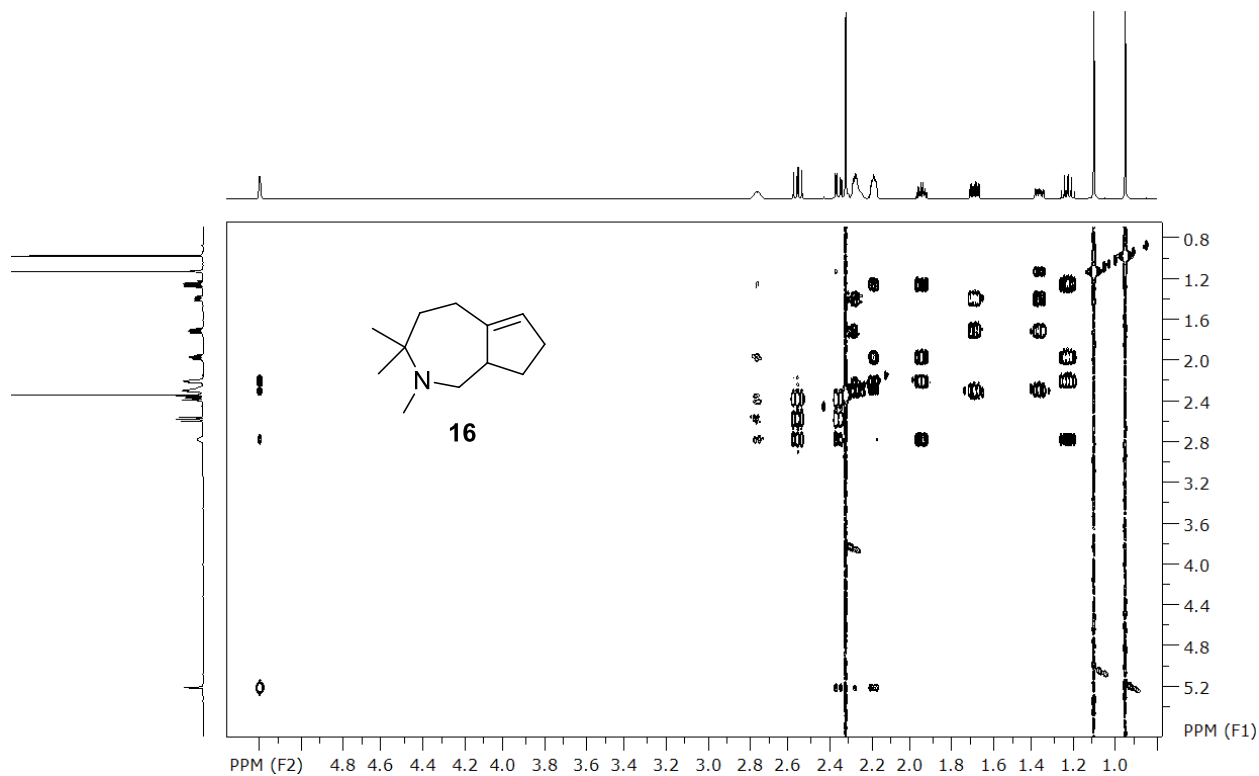

**Figure S54.**  $^1\text{H}$ - $^1\text{H}$  COSY NMR spectrum of **16** in  $\text{CDCl}_3$

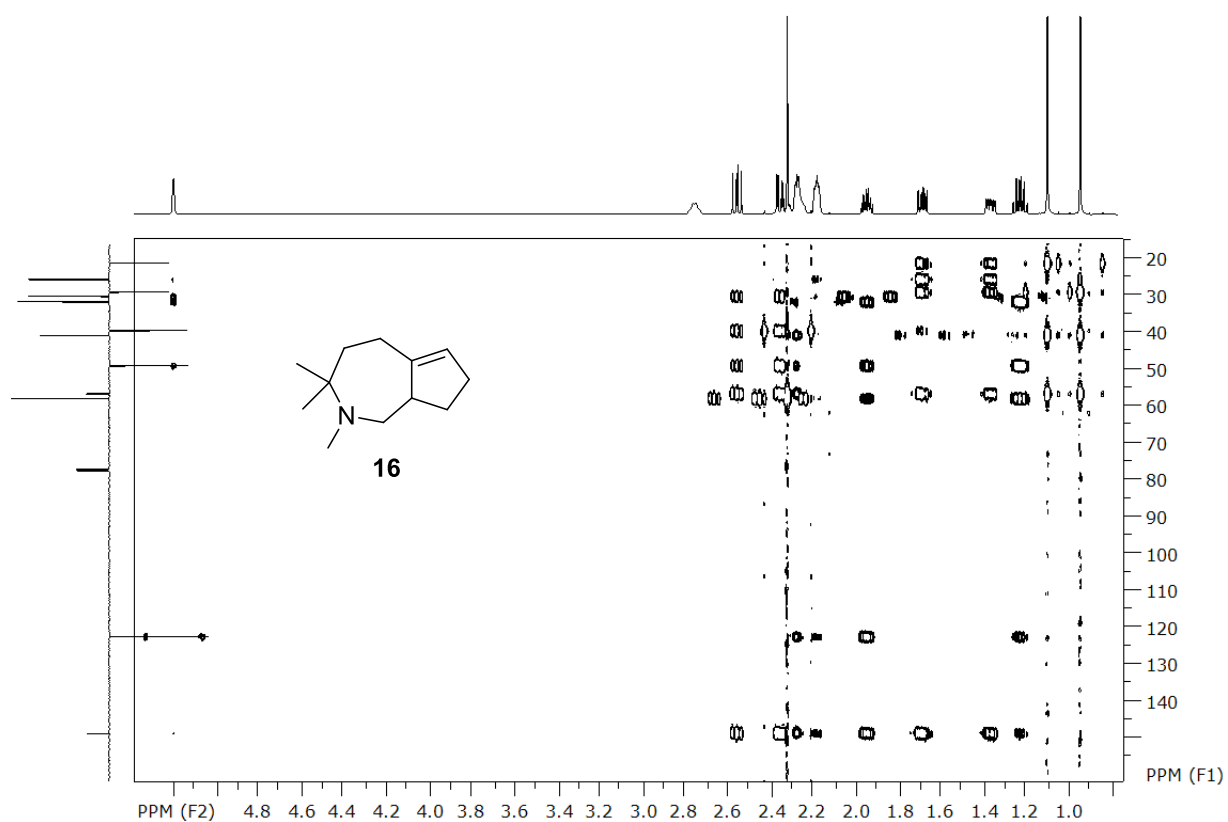

**Figure S55.**  $^1\text{H}$ - $^{13}\text{C}$  HMBC NMR spectrum of **16** in  $\text{CDCl}_3$

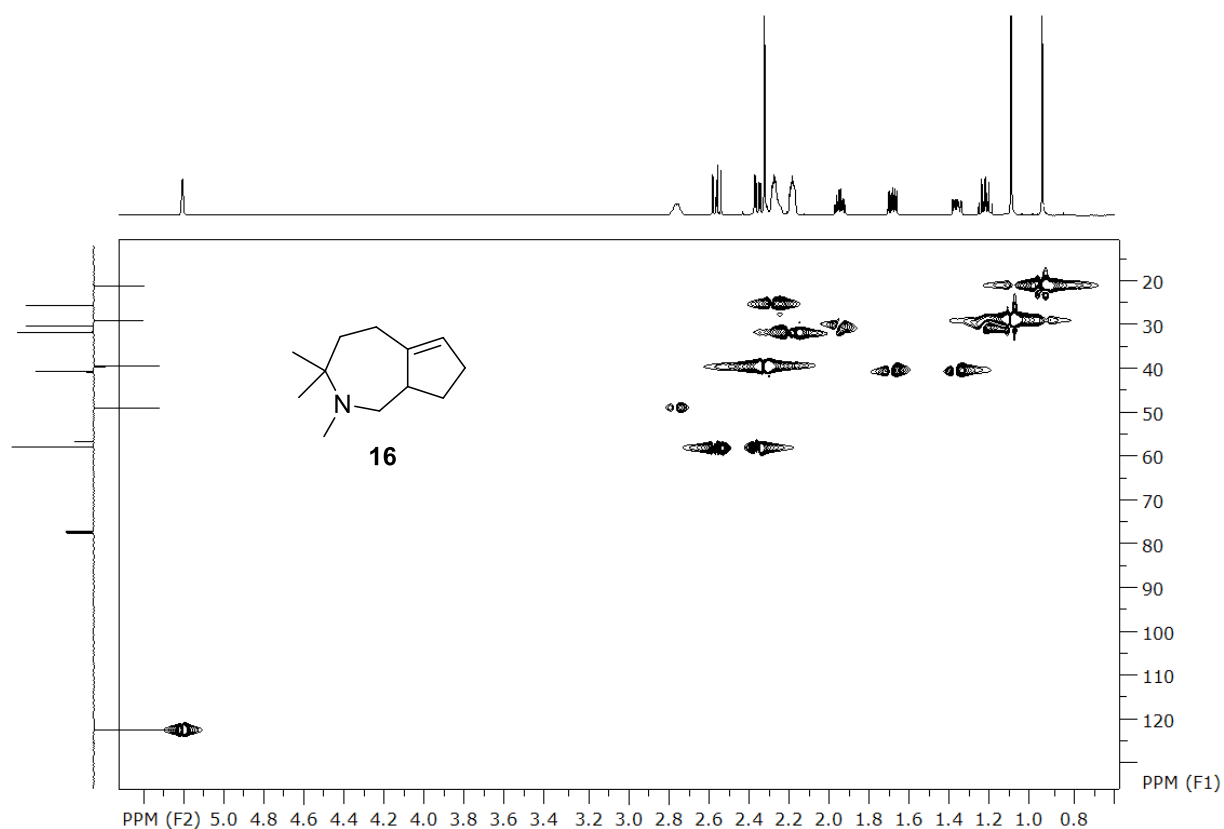

**Figure S56.**  $^1\text{H}$ - $^{13}\text{C}$  HSQC NMR spectrum of **16** in  $\text{CDCl}_3$

5. EPR spectral data

5.1 (5*R*(*S*),6*R*(*S*))-6-((Benzoyloxy)methyl)-2,2-dimethyl-1-azaspiro[4.4]nonan-1-oxyl (**13**)

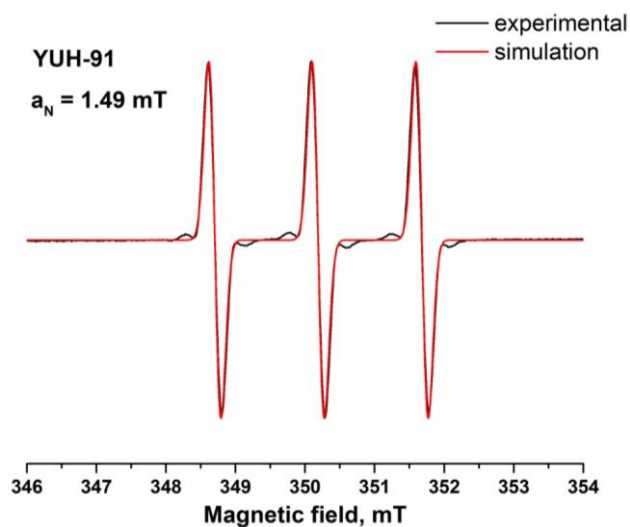

**Figure S57.** EPR spectrum of **13** in CH<sub>3</sub>OH; field sweep, 100 Gs; modulation amplitude, 0.4 Gs; microwave power, 2.0 mW; time constant, 20.48 ms; spectrum scan time, 21.39 s; number of scans 16.

6. Gas chromatography data

6.1 Gas chromatography data of Hofmann elimination of salt **15** (reaction mass)

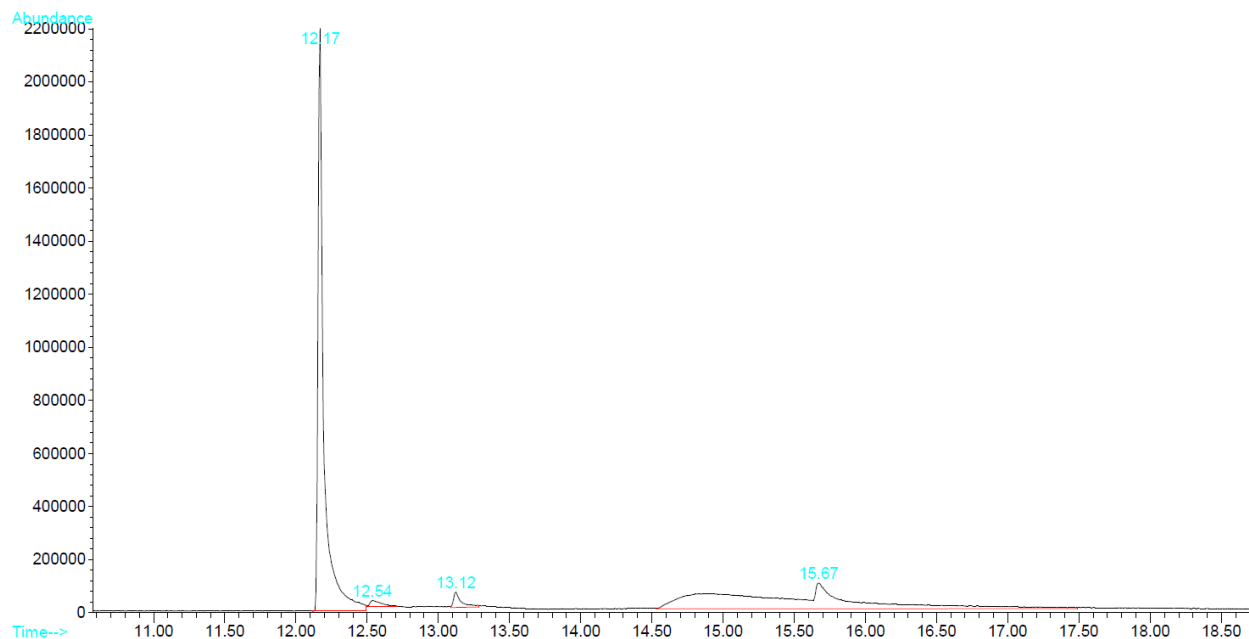

**Figure S58.** Chromatogram of reaction mass from Hofmann elimination of salt **15**.



**Table S1.** Total Ion Chromatogram of reaction mass from Hofmann elimination of salt **15**.

| Retention Time | Area     | Area % | Name   |
|----------------|----------|--------|--------|
| 11.816         | 90170    | 0.510  | MM=165 |
| 12.199         | 14640088 | 82.760 | MM=179 |
| 12.516         | 176244   | 0.996  | MM=179 |
| 13.130         | 110428   | 0.624  | MM=195 |
| 13.253         | 90884    | 0.514  | MM=177 |
| 13.837         | 40827    | 0.231  | MM=225 |
| 15.729         | 2541191  | 14.365 | MM=197 |

## 7. X-ray analysis data for compound **3×HBr**

### 7.1 Experimental details for compound **3×HBr**

Crystallographic data for salt **3×HBr**:  $C_{11}H_{20}N^+Br^-$ ,  $M$  246.19, orthorhombic,  $Pna2_1$ ,  $a$  13.5147(5),  $b$  8.8425(4),  $c$  10.0361(3) Å,  $V$  1199.35(8) Å<sup>3</sup>,  $Z$  4,  $D_{\text{calcd}}$  1.363 g·cm<sup>-3</sup>,  $\mu(\text{Mo-K}\alpha)$  3.388 mm<sup>-1</sup>,  $F(000)$  512, ( $\theta$  3.07 – 26.42°, completeness 98.5%),  $T$  296(2) K, colorless plate, crystal size (0.80 × 0.50 × 0.18) mm<sup>3</sup>, transmission 0.0900 – 0.1495, 18018 measured reflections in index range  $-16 \leq h \leq 16$ ,  $-11 \leq k \leq 11$ ,  $-12 \leq l \leq 12$ , 2394 independent ( $R_{\text{int}}$  0.0270), 121 parameters, 11 restraints,  $R_1$  0.0376 (for 1979 observed  $I > 2\sigma(I)$ ),  $wR_2$  0.0962 (all data), GOOF 1.069, largest diff. peak and hole 0.70 and -0.44 e.Å<sup>-3</sup>.

### 7.2 The structure and atom numbering of **3×HBr**

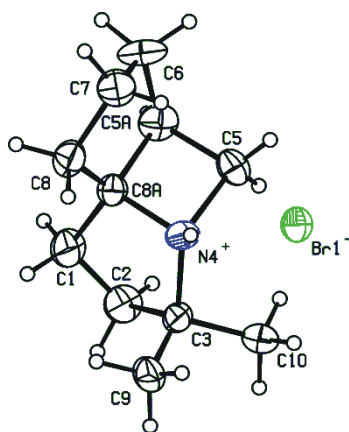**Figure S59.** The structure and atom numbering of **3×HBr** (The thermal ellipsoids are drawn at the 30% probability level).

8. NMR spectrum fine structure analysis

8.1 (5a*S*(*R*),8a*R*(*S*))-3,3-Dimethyloctahydro-1*H*-cyclopenta[2,3]azeto[1,2-*a*]pyrrol-4-ium bromide (3×HBr)

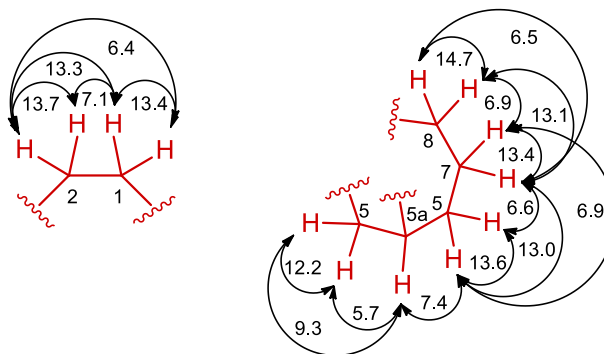

**Figure S60.** NMR spectrum fine structure analysis of 3×HBr

## 8.2 Line shape analysis of multiplets for 3×HBr

Line shape analysis of multiplets for 3×HBr was performed using the gNMR 5.0 software is shown in **Figure S61**. Parameters of spin system are shown in **Table S2**.

[Budzelaar, P. H. M. "gNMR, version 5.0. 6.0." *Ivorysoft, Nijmegen, Netherlands* (2006).]

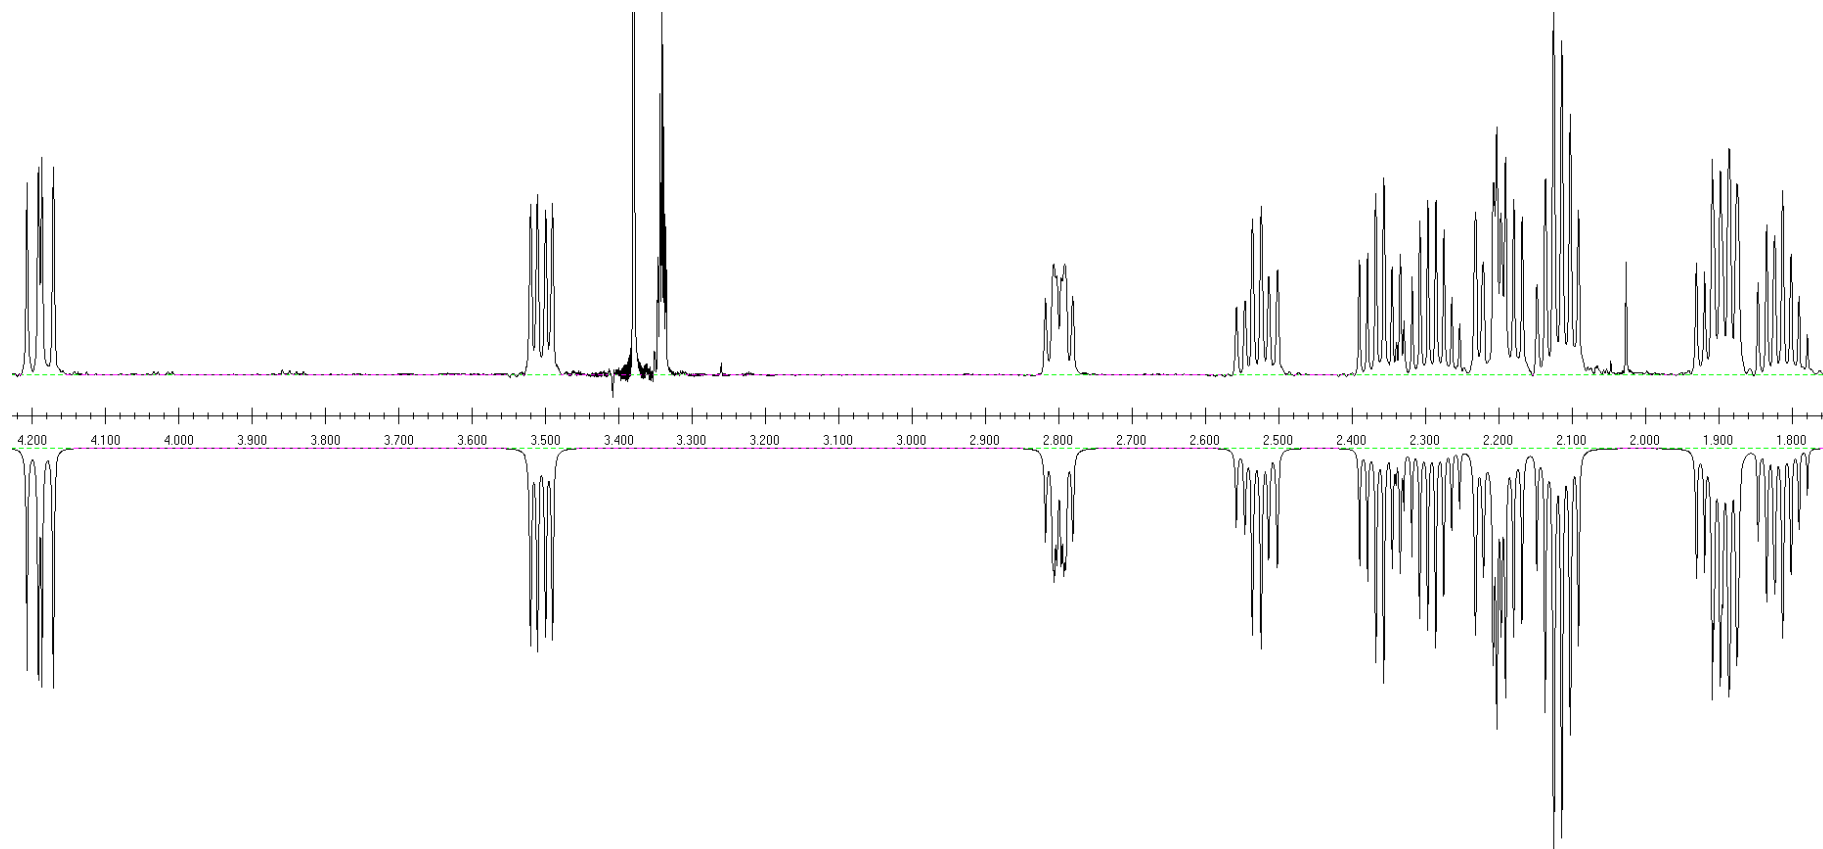

**Figure S61.** Line shape analysis of multiplets for 3×HBr

**Table S2.** Parameters of spin system for **3×HBr**.

| Nº | Nucleus | n | Shift | Width | J[1]   | J[2] | J[3] | J[4]  | J[5]   | J[6]   | J[7]   | J[8] | J[9] | J[10] | J[11] | J[12]  |
|----|---------|---|-------|-------|--------|------|------|-------|--------|--------|--------|------|------|-------|-------|--------|
| 1  | 1H      | 1 | 4,188 | 1,40  |        |      |      |       |        |        |        |      |      |       |       |        |
| 2  | 1H      | 1 | 3,505 | 1,71  | -12,25 |      |      |       |        |        |        |      |      |       |       |        |
| 3  | 1H      | 1 | 2,799 | 1,83  | 9,30   | 5,67 |      |       |        |        |        |      |      |       |       |        |
| 4  | 1H      | 1 | 2,529 | 1,71  | 0,00   | 0,00 | 0,00 |       |        |        |        |      |      |       |       |        |
| 5  | 1H      | 1 | 2,362 | 1,30  | 0,00   | 0,00 | 0,00 | 13,26 |        |        |        |      |      |       |       |        |
| 6  | 1H      | 1 | 2,295 | 1,11  | 0,00   | 0,00 | 0,00 | 0,00  | 0,00   |        |        |      |      |       |       |        |
| 7  | 1H      | 1 | 2,214 | 1,95  | 0,00   | 0,00 | 0,00 | 0,00  | 0,00   | 6,55   |        |      |      |       |       |        |
| 8  | 1H      | 1 | 2,186 | 1,56  | 0,00   | 0,00 | 0,00 | 7,09  | -13,74 | 0,00   | 0,00   |      |      |       |       |        |
| 9  | 1H      | 1 | 2,126 | 1,41  | 0,00   | 0,00 | 0,00 | 0,00  | 0,00   | -13,44 | 0,00   | 0,00 |      |       |       |        |
| 10 | 1H      | 1 | 2,108 | 1,55  | 0,00   | 0,00 | 0,00 | 13,35 | 6,41   | 0,00   | 0,00   | 0,00 | 0,00 |       |       |        |
| 11 | 1H      | 1 | 1,903 | 1,47  | 0,00   | 0,00 | 0,00 | 0,00  | 0,00   | 13,12  | -14,76 | 0,00 | 6,86 | 0,00  |       |        |
| 12 | 1H      | 1 | 1,890 | 2,15  | 0,00   | 0,00 | 0,00 | 0,00  | 0,00   | 6,58   | 0,00   | 0,00 | 0,00 | 0,00  | 0,00  |        |
| 13 | 1H      | 1 | 1,815 | 1,18  | 0,00   | 0,00 | 7,43 | 0,00  | 0,00   | 12,97  | 0,00   | 0,00 | 6,89 | 0,00  | 0,00  | -13,57 |

## 9. HPLC analysis

9.1 HPLC analysis of 2-(benzyloxy)-3,3-dimethyl-1,2,3,4,5,7,8,8a-octahydrocyclopenta[*c*]azepine (**4c**) and 2-(benzyloxy)-3,3-dimethyl-1,2,3,4,5,6,7,8-octahydrocyclopenta[*c*]azepine (**6c**) mixture and pure **4c** fraction.

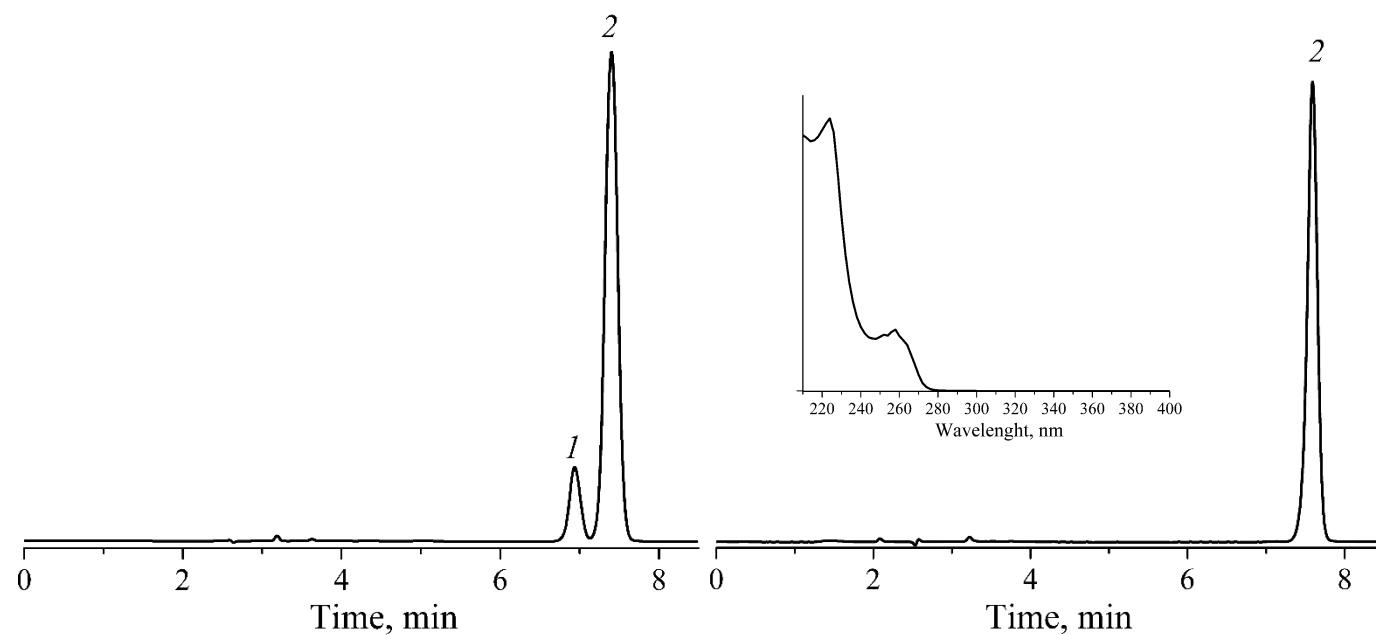

**Figure S62.** The HPLC-UV analysis of **4c** and **6c** mixture (left) and pure **4c** fraction (right); column: Zorbax C8 (250 mm × 4.6 mm, i.d., 5μm); mobile phase: acetonitrile/water (8:2 v/v); flow rate: 1.0 mL/min; wavelength: 260 nm; temperature: 35 °C; sampling volume: 20 μL; insert: UV spectrum of **4c**.
